# Supplementary material for: Structural brain lesions and restless legs syndrome: a cross-sectional population-based study
Source: PubMed Central journal article supplement — BMJ Open. 2014 Nov 24;4(11):e005938. doi: 10.1136/bmjopen-2014-005938 (PMC4244423; doi:10.1136/bmjopen-2014-005938), 2014-11-24
Supplement: bmjopen-2014-005938.draft_revisions.pdf [file bmjopen-2014-005938.draft_revisions.pdf]

# BMJ Open

## Structural Brain Lesions and Restless Legs Syndrome: A cross-sectional population-based study

|                                 |                                                                                                                                                                                                                                                                                                                                                                                                                                                                                                                                                                                                                                                                                                                                                                                                                                                                           |
|---------------------------------|---------------------------------------------------------------------------------------------------------------------------------------------------------------------------------------------------------------------------------------------------------------------------------------------------------------------------------------------------------------------------------------------------------------------------------------------------------------------------------------------------------------------------------------------------------------------------------------------------------------------------------------------------------------------------------------------------------------------------------------------------------------------------------------------------------------------------------------------------------------------------|
| Journal:                        | <i>BMJ Open</i>                                                                                                                                                                                                                                                                                                                                                                                                                                                                                                                                                                                                                                                                                                                                                                                                                                                           |
| Manuscript ID:                  | bmjopen-2014-005938                                                                                                                                                                                                                                                                                                                                                                                                                                                                                                                                                                                                                                                                                                                                                                                                                                                       |
| Article Type:                   | Research                                                                                                                                                                                                                                                                                                                                                                                                                                                                                                                                                                                                                                                                                                                                                                                                                                                                  |
| Date Submitted by the Author:   | 18-Jun-2014                                                                                                                                                                                                                                                                                                                                                                                                                                                                                                                                                                                                                                                                                                                                                                                                                                                               |
| Complete List of Authors:       | Rist, Pamela; Brigham and Women's Hospital, Division of Preventive Medicine<br>Tzourio, Christophe; INSERM Research Center for Epidemiology and Biostatistics (U897), Team Neuroepidemiology<br>Elbaz, Alexis; INSERM Centre for Research in Epidemiology and Population Health U1018, Social and occupational determinants of health F-94807<br>Soumare, Aicha; INSERM Research Center for Epidemiology and Biostatistics (U897), Team Neuroepidemiology<br>Dufouil, Carole; INSERM Research Center for Epidemiology and Biostatistics (U897), Team Neuroepidemiology<br>Mazoyer, Bernard; College of Health Science, University of Bordeaux, CNRS CEA (UMR5296) Neurofunctional Imaging Group<br>Kurth, Tobias; INSERM Research Center for Epidemiology and Biostatistics (U897), Team Neuroepidemiology; Brigham and Women's Hospital, Division of Preventive Medicine |
| <b>Primary Subject Heading</b>: | Epidemiology                                                                                                                                                                                                                                                                                                                                                                                                                                                                                                                                                                                                                                                                                                                                                                                                                                                              |
| Secondary Subject Heading:      | Neurology                                                                                                                                                                                                                                                                                                                                                                                                                                                                                                                                                                                                                                                                                                                                                                                                                                                                 |
| Keywords:                       | Epidemiology < TROPICAL MEDICINE, restless legs syndrome, MRI                                                                                                                                                                                                                                                                                                                                                                                                                                                                                                                                                                                                                                                                                                                                                                                                             |
|                                 |                                                                                                                                                                                                                                                                                                                                                                                                                                                                                                                                                                                                                                                                                                                                                                                                                                                                           |

SCHOLARONE™  
Manuscripts

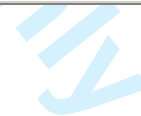

1  
2  
3 **Structural Brain Lesions and Restless Legs Syndrome: A cross-sectional population-based**  
4  
5  
6 **study**  
7

8 Pamela M. Rist, ScD, Christophe Tzourio, MD, PhD, Alexis Elbaz, MD, PhD, Aïcha Soumaré,  
9  
10 PhD, Carole Dufouil, PhD, Bernard Mazoyer, MD, PhD, Tobias Kurth, MD, ScD  
11  
12  
13  
14  
15

16 From the Division of Preventive Medicine (P.M.R., T.K.), Department of Medicine, Brigham  
17 and Women's Hospital, Harvard Medical School, Boston, MA; the Department of Social and  
18 Behavioral Sciences (P.M.R.) and the Department of Epidemiology (P.M.R., T.K.), Harvard  
19 School of Public Health, Boston, MA; INSERM Research Center for Epidemiology and  
20 Biostatistics (U897)– Team Neuroepidemiology (C.T., A.S., C.D., T.K.), Bordeaux, France,  
21 INSERM, Centre for Research in Epidemiology and Population Health, U1018, Social and  
22 occupational determinants of health, F-94807 (A.E.), Villejuif, France; Université de Versailles  
23 St-Quentin, UMRS 1018, F-78035 (A.E.), Versailles, France; CNRS CEA (UMR5296)  
24 Neurofunctional Imaging Group, College of Health Sciences, University of Bordeaux (B.M.),  
25 Bordeaux, France; and College of Health Sciences, University of Bordeaux (T.K., C.T., C.D.),  
26 Bordeaux, France.  
27  
28  
29  
30  
31  
32  
33  
34  
35  
36  
37  
38  
39  
40  
41  
42  
43  
44

45 Corresponding Author:

46 Tobias Kurth, MD, ScD

47 Inserm Research Center for Epidemiology and Biostatistics (U897) - Team Neuroepidemiology

48 University of Bordeaux

49 146 rue Léo Saignat - CS61292, 33076

50 Bordeaux, France  
51  
52  
53  
54  
55  
56  
57  
58  
59  
60

1  
2  
3 p: [+33 5 47 30 42 56](tel:+33547304256)  
4

5  
6 e: [tobias.kurth@u-bordeaux.fr](mailto:tobias.kurth@u-bordeaux.fr)  
7  
8  
9

10 Alternate Corresponding Author:  
11

12  
13 Pamela M. Rist  
14

15  
16 900 Commonwealth Avenue, 3rd floor  
17  
18

19  
20 Boston, MA 02215  
21  
22

23 Tel: (617) 278-0878  
24  
25

26 Fax: (617) 731-3843  
27  
28

29 E-mail: [prist@mail.harvard.edu](mailto:prist@mail.harvard.edu)  
30  
31  
32  
33  
34  
35  
36

37 **Key words:** Epidemiology, Restless Legs Syndrome, MRI  
38

39 **Running head:** Structural Brain Lesions and Restless Legs Syndrome  
40  
41  
42  
43  
44  
45  
46  
47  
48  
49  
50  
51  
52  
53  
54  
55  
56  
57  
58  
59  
60

**Abstract**

**Objective:** To evaluate the association between white matter lesion volume, silent infarcts, and restless legs syndrome in a population-based study of elderly individuals.

**Design:** Cross-sectional study

**Setting:** Population-based Three-City study

**Participants:** 1268 individuals from the Dijon, France center of the Three-City study who had available information on volume of white matter lesions (WML) from MRI scans and who answered questions about the prevalence of restless legs syndrome

**Primary Outcome Measure:** Prevalence of restless legs syndrome

**Results:** White matter lesion volume was measured using an automated tissue segmentation method. Logistic regression was used to evaluate adjusted associations between tertiles of WML volume and restless legs syndrome and between silent infarcts and restless legs syndrome. 218 individuals (17.2%) were determined to have restless legs syndrome. Compared to those in the first tertile of WML volume, individuals in the second tertile (OR=0.95; 95% CI: 0.66, 1.37) or third tertile (OR=1.00; 95% CI: 0.69, 1.46) did not have an increased prevalence of restless legs syndrome. We also did not observe associations between the volume of deep or periventricular WML and restless legs syndrome; nor did we observe an association between silent brain infarcts and RLS (OR=0.61; 95% CI: 0.33, 1.11). These findings were not modified by age or gender.

**Conclusion:** Higher volume of WML and the presence of silent infarcts were not associated with an increased prevalence of restless legs syndrome in this population-based cohort of elderly individuals.

## Article Summary

### Article focus

- The aim of this study is to evaluate the association between white matter lesion volume, silent infarcts, and restless legs syndrome (RLS) in a population-based study of elderly individuals.

### Key messages

- We found no cross-sectional association between WML volume or brain infarcts and RLS. The results of this study do not support an association between RLS and vascular brain lesions.

### Strengths and limitations of this study

- Strengths include the population-based setting with available brain imaging, the size of the cohort, standardized assessment of RLS using criteria from the International Restless Legs Study Group and use of an automated measurement procedure to quantify and localize WML.
- Limitations to this study include its cross-sectional design, lack of information on kidney disease or iron deficiency for participants, and self-reported information on RLS. Additionally, RLS status was not assessed at baseline and participants who were still in the study at restless legs assessment may be healthier than participants who died or dropped out prior to RLS assessment.

## Introduction

Restless legs syndrome (RLS) is a neurological disorder that originates in the motoneurons of the brain and is characterized by an urge to move the legs and unpleasant leg sensations. Population based studies using the minimal diagnostic criteria from the International Restless Legs Syndrome Study Group[1 2] have found the prevalence of RLS ranges from 6% to 12% with women being affected twice as often as men.[3] In addition, the prevalence of RLS increases with age.[3] While the causes of RLS are unknown, some studies have suggested that dysfunction of the dopaminergic system may contribute to disease development. However, neuroimaging studies have not shown any primary neurodegeneration of dopaminergic neurons in the substantia nigra.[4] A large genetics consortium study has found some genetic variants that may be associated with the development of RLS.[5]

Several studies have found associations between cardiovascular risk factors including smoking[6-10], diabetes[7 9 11], hypercholesterolemia[9 10], exercise[9], body mass index[6 9 12 13] and hypertension[7 14 15] and RLS. However, evidence for an association between RLS and incident cardiovascular disease is mixed.[6 9 11 15-20] One recent longitudinal study did not find evidence of an association between RLS and incident cardiovascular disease[21] while others have found an association between RLS and coronary heart disease[22 23] and mortality.[24] Several possible biological mechanisms have been proposed to explain why RLS may be associated with high blood pressure, heart disease, and stroke. RLS is associated with sympathetic hyperactivity which may lead to daytime hypertension which itself is a risk factor for heart disease and stroke. Alternatively, even if the sympathetic hyperactivity does not lead to daytime hypertension, it may impact atherosclerotic plaque formation and rupture which could lead to heart disease and stroke. Other comorbidities associated with RLS may also be risk

1  
2  
3 factors for heart disease and stroke.[25] In addition to its association with cardiovascular risk  
4  
5 factors, RLS is also associated with migraine in both men and women.[26 27]  
6  
7

8  
9 Given the association of RLS with several vascular risk factors as well as with migraine,  
10  
11 we were interested to know if white matter lesions (WML), which are also strongly related to  
12  
13 vascular risk factors, including migraine, and cardiovascular disease, were associated with RLS.  
14  
15 Using a population-based cohort of elderly individuals residing in France, we examined the  
16  
17 cross-sectional association between white matter lesion volume and RLS prevalence.  
18  
19

## 20 21 **Methods**

22  
23  
24 The Three-City (3C) is a longitudinal cohort study enrolling subjects living in three  
25  
26 French cities (Bordeaux, Dijon, and Montpellier) designed to estimate the risk of dementia and  
27  
28 cognitive impairment attributable to vascular risk factors.[28] The present analysis only uses data  
29  
30 from subjects living in Dijon because data on RLS were only collected in that city. Each subject  
31  
32 signed an informed consent statement and the Ethical Committee of the University Hospital of  
33  
34 Kremlin-Bicêtre approved the methods and procedures of the 3C study.  
35  
36  
37  
38

39  
40 To be eligible for the 3C study, the participant needs to live in Dijon, be registered on the  
41  
42 electoral rolls in 1999, be 65 years of older, and not be institutionalized. A total of 4,931  
43  
44 individuals were recruited at the Dijon site between 1999 and 2001. For the MRI sub-study, all  
45  
46 subjects recruited from the Dijon center who were <80 years of age and enrolled between June  
47  
48 1999 and September 2000 were eligible to participate. Of those eligible, 2,285 (82%) subjects  
49  
50 agreed to participate in the MRI study, but only 1,924 scans could be performed at baseline due  
51  
52 to financial constraints.  
53  
54  
55  
56  
57  
58  
59  
60

1  
2  
3 The process of obtaining the MRI information has been described in detail elsewhere.[29  
4 30] In brief, MRI scans were obtained using a 1.5T Magnetom (Siemens, Erlangen, Germany). A  
5  
6 3-dimensional (3D) high-resolution T1-weighted brain volume was obtained using a 3D  
7  
8 inversion recovery fast spoiled-gradient echo sequence. T2- and proton density (PD)-weighted  
9  
10 brain volumes were acquired using a 2-dimensional dual spin echo sequences with two echo  
11  
12 times. Each subject dataset (T1, T2, PD) was reconstructed and visually checked for major  
13  
14 artifacts before being stored.  
15  
16  
17  
18  
19

20  
21 A fully-automated image processing software was used to detect, measure, and localize  
22  
23 WMLs. The process has been described in detail previously[29 30]. Based on the morphologic  
24  
25 parameters (center of mass coordinates, Euclidian distance to the ventricular system, principal  
26  
27 axes dimension), each WML was labeled as being either periventricular if the distance to the  
28  
29 ventricular system was <10 mm or deep otherwise. Total volume of periventricular and deep  
30  
31 WMLs were estimated by summing the volumes of all periventricular and deep lesions.  
32  
33  
34  
35

36 We log transformed the values of total WML, periventricular WML, deep WML, and  
37  
38 total white matter volume as they were not normally distributed. We then divided the log  
39  
40 transformed values into tertiles to allow for non-linear associations between WML volumes and  
41  
42 RLS.  
43  
44  
45

46 Infarcts were rated on T1, T2, and PD-weighted images and defined as focal lesions  $\geq 3$   
47  
48 mm in diameter with the same signal characteristic as cerebrospinal fluid on all sequences. They  
49  
50 were discriminated from dilated Virchow-Robin spaces using multi-planar reformatting. Those  
51  
52 with a typical vascular shape and following the orientation of perforating vessels were classified  
53  
54 as dilated Virchow-Robin spaces and not as infarcts.[31]  
55  
56  
57  
58  
59  
60



### *Restless Legs Syndrome Assessment*

RLS was assessed at the fifth and sixth follow-up waves of the study. Participants were asked a series of questions designed to address the four minimal diagnostic criteria of the International Restless Legs Study Group which has been established and validated in previous studies.[32 33] The participants were asked: “Have you ever felt unpleasant sensation in the legs (restlessness, tingling, tension, annoyance, annoyances, contractions, twitching, numbness, electricity, etc.) with the irresistible need or want to move?” Response options were yes or no. If the participant responded “yes”, he or she was further asked: “Do these unpleasant sensations occur solely or mainly at rest (when you are sitting or lying down, without moving your legs) and do they improve with movement?” and “Are these unpleasant sensations more intense in the evening or at night than in the morning?” Response options for these questions were yes or no. If the participant responded yes to all three questions, he or she was defined as having RLS.

### *Covariates*

Trained psychologists collected sociodemographic and medical data on participants during home visits. Participants were asked if they were treated for various co-morbidities at baseline and in the fifth and sixth wave of the study. We used all available information from baseline to RLS assessment to determine a subject’s co-morbidity history. History of cardiovascular disease was defined as a history of myocardial infarction, stroke, angina, percutaneous transluminal coronary angioplasty, or coronary artery bypass surgery. History of diabetes was defined as glycemia  $\geq 7$  mmol/L or use of anti-diabetic treatment.[34] High blood pressure was defined as measured systolic blood pressure  $\geq 140$  mmHg or measured diastolic blood pressure  $\geq 90$  mmHg. High cholesterol was defined as lipid lowering treatment or

1  
2  
3 cholesterol  $\geq 6.2$  mmol/L. Information was also collected on history of peripheral artery disease,  
4  
5 history of leg operation, and history of edema/swelling of legs and ankles.  
6  
7

8 For the following covariates, we used values from the follow-up waves during which  
9  
10 RLS was assessed: body mass index, smoking status, alcohol consumption and physical activity.  
11  
12 If this value was missing, we used values from baseline. Height and weight were used to  
13  
14 calculate body mass index. Smoking status was reported as never, past, or current, and alcohol  
15  
16 consumption was measured in grams per day. Due to changes in the questionnaires on physical  
17  
18 activity over time, we classified participants as active versus non-active.  
19  
20  
21

### 22 23 *Statistical Analysis*

24  
25  
26 Of the 1924 individuals in the MRI sub-study, we excluded 581 participants who did not  
27  
28 answer any of the questions about RLS and the 75 participants who did not have data on total  
29  
30 WML volume, leaving a total of 1268 participants eligible for our analyses of which 218  
31  
32 (17.2%) reported RLS.  
33  
34  
35

36  
37 We performed a cross-sectional analysis using logistic regression to calculate odds ratios  
38  
39 and 95% confidence intervals of reporting RLS for each tertile of the WML volumes using the  
40  
41 lowest tertile as the reference group. Analyses examining the association between tertiles of total  
42  
43 WML volume and RLS adjusted for tertiles of total white matter as the likelihood of WML  
44  
45 correlates with the size of the total white matter. Analyses examining the association between  
46  
47 tertiles of periventricular or deep WML and RLS adjusted for tertiles of WML. We also used  
48  
49 logistic regression to examine the association between any brain silent infarct and RLS. For the  
50  
51 infarct analyses, we excluded participants with a brain tumor detected at MRI.  
52  
53  
54  
55  
56  
57  
58  
59  
60

1  
2  
3 We performed age- and sex-adjusted analyses and multivariable-adjusted analyses. Our  
4 multivariable analyses adjusted for age (continuous), sex, smoking status (never, past, or current  
5 smoker), alcohol consumption (0, 0 to  $\leq 12$ , 12 to  $\leq 24$ , and  $> 24$  grams/day), physical activity  
6 (active versus not active), body mass index ( $< 25$  kg/m<sup>2</sup>, 25 to  $< 30$  kg/m<sup>2</sup>, and  $\geq 30$  kg/m<sup>2</sup>), history  
7 of hypertension (yes/no), history of diabetes (yes/no), history of cardiovascular disease (yes/no),  
8 history of peripheral artery disease (yes/no), history of leg operation (yes/no), and history of  
9 edema/swelling of legs and ankles (yes/no). Further adjustment for measures of sleep quality,  
10 difficulty sleeping and taking sleep medications did not affect our results (results not shown).  
11 Less than 14 people were missing information on any covariate and were assigned to the most  
12 frequent value of that covariate. We also performed separate age-adjusted analyses stratified by  
13 sex or mean age (72 years).  
14  
15  
16  
17  
18  
19  
20  
21  
22  
23  
24  
25  
26  
27  
28  
29

30 We considered a two-tailed p value of  $< 0.05$  as statistically significant and used SAS  
31 9.1.3 as statistical software (Cary, NC).  
32  
33  
34  
35

## 36 Results

37  
38 The characteristics of the participants by RLS status can be seen in Table 1. Those who  
39 reported RLS were more likely to be female, never smokers, non-drinkers, and were less  
40 physically active than those who did not report RLS.  
41  
42  
43  
44  
45

46 We did not observe an association between tertiles of WML and RLS (Table 2).  
47 Compared to those in the lowest tertile of WML, the multivariable-adjusted odds ratio of  
48 reporting RLS was 0.95 (95% CI: 0.66, 1.37) for those in the second tertile and 1.00 (95% CI:  
49 0.69, 1.46) for those in the top tertile. We also did not observe an association between tertiles of  
50 deep or periventricular WML and RLS (Table 2).  
51  
52  
53  
54  
55  
56  
57  
58  
59  
60

1  
2  
3 We also performed age-adjusted analyses stratified by sex or mean age (72 years).

4  
5 Among men, compared to those in the lowest tertile of WML, the age-adjusted odds ratio of  
6 reporting RLS was 0.73 (95% CI: 0.36, 1.52) for those in the second tertile and 0.78 (95% CI:  
7 0.38, 1.56) for those in the top tertile. Among women, compared to those in the lowest tertile of  
8 WML, the age-adjusted odds ratio of reporting RLS was 1.02 (95% CI: 0.67, 1.55) for those in  
9 the second tertile and 1.07 (95% CI: 0.69, 1.66) for those in the top tertile. For those under 72  
10 years of age, the age-adjusted odds ratio of reporting RLS was 0.88 (95% CI: 0.55, 1.42) for  
11 those in the second tertile and 0.99 (95% CI: 0.59, 1.66) for those in the top tertile compared to  
12 those in the lowest tertile of WML. For those 72 years of age or older, the age-adjusted odds  
13 ratio of reporting RLS was 1.02 (95% CI: 0.58, 1.80) for those in the second tertile and 1.05  
14 (95% CI: 0.61, 1.78) for those in the top tertile compared to those in the lowest tertile of WML.  
15  
16  
17  
18  
19  
20  
21  
22  
23  
24  
25  
26  
27  
28  
29

30 We also explored whether there was an association between infarcts and RLS. Of the  
31 1330 people with information on brain infarcts, 131 had a brain infarct and 225 reported RLS.  
32 The age- and sex-adjusted odds ratio between infarcts and RLS was 0.59 (95% CI: 0.32, 1.07).  
33 The multivariable-adjusted odds ratios between infarcts and RLS was 0.61 (95% CI: 0.33, 1.11).  
34  
35  
36  
37  
38  
39  
40  
41  
42

### 43 **Discussion**

44  
45 In this large, population-based study of elderly individuals, we found no cross-sectional  
46 association between WML volume or brain infarcts and RLS. The results of this study do not  
47 support an association between RLS and vascular brain lesions.  
48  
49  
50  
51  
52

53 Previous research on the association between WML volume and RLS is limited. A small  
54 study of 45 patients found that white matter hyperintensities were correlated with total limb  
55 movements per hour of sleep after adjusting for hypertension ( $r=0.66$ ,  $p=0.01$ ).<sup>[35]</sup> The authors  
56  
57  
58  
59  
60

1  
2  
3 suggest that leg movements may be associated with poor quality sleep which may contribute to  
4  
5 episodes of nocturnal hypertension. Although nocturnal hypertension has been associated with  
6  
7 the development of white matter hyperintensities even among those with daytime  
8  
9 hypertension[36], this study did not present results on the association between RLS and white  
10  
11 matter hyperintensities. Additionally, it is unclear if the authors adjusted for other potential  
12  
13 confounders including age and sex.  
14  
15  
16

17  
18 Another study using data from the Memory and Morbidity in Augsburg Elderly Study  
19  
20 (MEMO) examined the association between RLS and brain lesions detected using MRI. They  
21  
22 found a non-significant increase risk of silent infarction (OR=2.11, 95% CI: 0.71-6.27) and  
23  
24 subcortical brain lesions greater than or equal to 10mm (OR=1.35, 95% CI: 0.56-3.22) in those  
25  
26 who reported RLS compared to those without RLS.[25] The small size of this study (26 RLS  
27  
28 cases and 241 controls) and limited power to control for confounding by cardiovascular risk  
29  
30 factors may explain some of the differences between the results of the MEMO study and our  
31  
32 study.  
33  
34  
35  
36  
37

38 While evidence for a direct association between WML and RLS is limited, some cross-  
39  
40 sectional studies have suggested that RLS may be associated with hypertension[14], stroke[9 37],  
41  
42 and migraine[26 27], which are associated with WML. However, a recent longitudinal study  
43  
44 found no association between RLS and incident cardiovascular disease [21] and not all cross-  
45  
46 sectional studies have found associations between hypertension and RLS.[9 11] Our study did  
47  
48 not find an association between RLS and structural brain lesions which are strongly related to  
49  
50 vascular risk factors and cardiovascular disease. This observation aligns with the previous study  
51  
52 that did not find an association between RLS and incident cardiovascular disease.  
53  
54  
55  
56  
57  
58  
59  
60

1  
2  
3 This study has several strengths including the population-based setting with available  
4 brain imaging, the size of the cohort, and standardized assessment of RLS using criteria from the  
5 International Restless Legs Study Group.[1 2] We also used an automated measurement  
6 procedure to quantify and localize WML. Compared to visual scale, automated procedures are  
7 not subject to a ceiling effect, permit better discrimination of lesion volume, and are more  
8 sensitive in detecting small group differences.[38]  
9  
10  
11  
12  
13  
14  
15  
16  
17

18 Limitations to this study include its cross-sectional design which prevents us from  
19 determining the temporal ordering of RLS and WML or examining how RLS may impact WML  
20 progression over time. RLS was first assessed in the fifth and sixth waves of the study.  
21 Participants who were still in the study then may be healthier than participants who died or  
22 dropped out prior to RLS assessment. We did not have information on kidney disease or iron  
23 deficiency for participants, which may be related to RLS. Information on RLS was self-reported  
24 and potential misclassification is possible. However, we used the best available questionnaire for  
25 population-level assessment of RLS and this questionnaire has been validated in previous  
26 cohorts.[32 33]  
27  
28  
29  
30  
31  
32  
33  
34  
35  
36  
37  
38  
39

40 While our data do not support a strong association between structural brain lesions and  
41 RLS, further targeted research is warranted to evaluate whether subgroups of patients with RLS  
42 exist who are at increased risk for structural brain lesions.  
43  
44  
45  
46  
47  
48  
49  
50  
51  
52  
53  
54  
55  
56  
57  
58  
59  
60

## Authorship Contributions

Pamela M. Rist: drafting/revising the manuscript for content, including medical writing for content; study concept or design; and analysis or interpretation of data

Christophe Tzourio: obtaining funding, interpretation of data, revising the manuscript for content, and supervision

Alexis Elbaz: interpretation of data and revising the manuscript for content

Aicha Soumare: interpretation of data and revising the manuscript for content

Carole Dufouil: interpretation of data and revising the manuscript for content

Bernard Mazoyer: interpretation of data and revising the manuscript for content

Tobias Kurth: Conception and design, interpretation of data, revising the manuscript for content, and supervision

All authors have approved the final version of the manuscript and agree to be accountable for all aspects of the work in ensuring that questions related to the accuracy or integrity of any part of the work are appropriately investigated and resolved.

## Study Funding:

The 3C study is conducted under a partnership agreement between the Institut National de la Santé et de la Recherche Médicale (INSERM), the Victor Segalen–Bordeaux II University, and the Sanofi-Synthélabo Company. The Fondation pour la Recherche Médicale funded the preparation and initiation of the study. The 3C Study is also supported by the Caisse Nationale

1  
2  
3 Maladie des Travailleurs Salariés, Direction Générale de la Santé, Haute Autorité de la Santé,  
4  
5 Institut National de Prévention et d'Education pour la Santé, Conseils Régionaux of Bourgogne,  
6  
7  
8 Fondation de France, Ministry of Research-INSERM Program “Cohortes et collections de  
9  
10 données biologiques,” Mutuelle Générale de l'Education Nationale, Institut de  
11  
12 la Longévité, Conseil Général de la Côte d'or. Pamela M. Rist was supported by the Rose  
13  
14 Traveling Fellowship Program in Chronic Disease Epidemiology and Biostatistics from the  
15  
16 Harvard School of Public Health.  
17  
18  
19  
20  
21

### 22 **Full Author Disclosures:**

23  
24 Pamela M. Rist has received within the last 2 years funding from a training grant from the  
25  
26 National Institute of Aging and from the Rose Traveling Fellowship Program in Chronic Disease  
27  
28 Epidemiology and Biostatistics from the Harvard School of Public Health.  
29  
30

31  
32 Christophe Tzourio has received fees from the Fondation Plan Alzheimer, the Fondation de  
33  
34 Recherche sur l'Hypertension Artérielle, and ABBOTT for participating in scientific committees.  
35  
36 He has also received investigator-initiated research funding from the French National Research  
37  
38 Agency (ANR) and the Fondation Plan Alzheimer for the 3C study.  
39  
40

41  
42 Tobias Kurth has received within the last 2 years investigator-initiated research funding from the  
43  
44 French National Research Agency, and the US National Institutes of Health. Further, he has  
45  
46 received honoraria from the American Academy of Neurology for educational lectures and from  
47  
48 the *BMJ* and *Cephalalgia* for editorial services.  
49

50  
51 Alexis Elbaz has received within the last 2 years investigator-initiated research funding unrelated  
52  
53 to this project from the French National Research Agency, EU Joint Programme –  
54  
55  
56  
57  
58  
59  
60



1  
2  
3 Neurodegenerative Disease Research (JPND), the French Agency for Drug Security (ANSM),  
4  
5 and the French Institute for Research in Public Health (IRESP).  
6  
7

8 Aicha Soumare has no disclosures.  
9

10 Carole Dufouil has received honoraria from the American Academy of Neurology for  
11  
12 educational lectures and from Eisai, Inc. for providing methodological expertise.  
13  
14

15 Bernard Mazoyer has no disclosures.  
16

### 17 **Data Sharing Statement**

18 No additional data available  
19  
20  
21  
22  
23  
24  
25  
26  
27  
28  
29  
30  
31  
32  
33  
34  
35  
36  
37  
38  
39  
40  
41  
42  
43  
44  
45  
46  
47  
48  
49  
50  
51  
52  
53  
54  
55  
56  
57  
58  
59  
60

## References

1. Allen RP, Picchiatti D, Hening WA, et al. Restless legs syndrome: diagnostic criteria, special considerations, and epidemiology. A report from the restless legs syndrome diagnosis and epidemiology workshop at the National Institutes of Health. *Sleep medicine* 2003;**4**(2):101-19
2. Walters AS. Toward a better definition of the restless legs syndrome. The International Restless Legs Syndrome Study Group. *Movement disorders : official journal of the Movement Disorder Society* 1995;**10**(5):634-42 doi: 10.1002/mds.870100517[published Online First: Epub Date].
3. Berger K, Kurth T. RLS epidemiology--frequencies, risk factors and methods in population studies. *Movement disorders : official journal of the Movement Disorder Society* 2007;**22 Suppl 18**:S420-3 doi: 10.1002/mds.21589[published Online First: Epub Date].
4. Paulus W, Dowling P, Rijsman R, Stiasny-Kolster K, Trenkwalder C, de Weerd A. Pathophysiological concepts of restless legs syndrome. *Movement disorders : official journal of the Movement Disorder Society* 2007;**22**(10):1451-6 doi: 10.1002/mds.21533[published Online First: Epub Date].
5. Winkelmann J, Schormair B, Lichtner P, et al. Genome-wide association study of restless legs syndrome identifies common variants in three genomic regions. *Nature genetics* 2007;**39**(8):1000-6 doi: 10.1038/ng2099[published Online First: Epub Date].
6. Ohayon MM, Roth T. Prevalence of restless legs syndrome and periodic limb movement disorder in the general population. *Journal of psychosomatic research* 2002;**53**(1):547-54
7. Phillips B, Young T, Finn L, Asher K, Hening WA, Purvis C. Epidemiology of restless legs symptoms in adults. *Archives of internal medicine* 2000;**160**(14):2137-41
8. Sevim S, Dogu O, Camdeviren H, et al. Unexpectedly low prevalence and unusual characteristics of RLS in Mersin, Turkey. *Neurology* 2003;**61**(11):1562-9
9. Winter AC, Schurks M, Glynn RJ, et al. Vascular risk factors, cardiovascular disease, and restless legs syndrome in women. *The American journal of medicine* 2013;**126**(3):220-7, 27 e1-2 doi: 10.1016/j.amjmed.2012.06.040[published Online First: Epub Date].
10. Schlesinger I, Erikh I, Avizohar O, Sprecher E, Yarnitsky D. Cardiovascular risk factors in restless legs syndrome. *Movement disorders : official journal of the Movement Disorder Society* 2009;**24**(11):1587-92 doi: 10.1002/mds.22486[published Online First: Epub Date].
11. Winter AC, Berger K, Glynn RJ, et al. Vascular risk factors, cardiovascular disease, and restless legs syndrome in men. *The American journal of medicine* 2013;**126**(3):228-35, 35 e1-2 doi: 10.1016/j.amjmed.2012.06.039[published Online First: Epub Date].
12. Kim J, Choi C, Shin K, et al. Prevalence of restless legs syndrome and associated factors in the Korean adult population: the Korean Health and Genome Study. *Psychiatry and clinical neurosciences* 2005;**59**(3):350-3 doi: 10.1111/j.1440-1819.2005.01381.x[published Online First: Epub Date].
13. Gao X, Schwarzschild MA, Wang H, Ascherio A. Obesity and restless legs syndrome in men and women. *Neurology* 2009;**72**(14):1255-61 doi: 10.1212/01.wnl.0000345673.35676.1c[published Online First: Epub Date].
14. Batool-Anwar S, Malhotra A, Forman J, Winkelmann J, Li Y, Gao X. Restless legs syndrome and hypertension in middle-aged women. *Hypertension* 2011;**58**(5):791-6 doi: 10.1161/HYPERTENSIONAHA.111.174037[published Online First: Epub Date].
15. Ulfberg J, Nystrom B, Carter N, Edling C. Prevalence of restless legs syndrome among men aged 18 to 64 years: an association with somatic disease and neuropsychiatric symptoms. *Movement disorders : official journal of the Movement Disorder Society* 2001;**16**(6):1159-63
16. Allen R, Chen C, Soaita A, et al. A randomized, double-blind, 6-week, dose-ranging study of pregabalin in patients with restless legs syndrome. *Sleep medicine* 2010;**11**(6):512-9 doi: 10.1016/j.sleep.2010.03.003[published Online First: Epub Date].

17. Juuti AK, Laara E, Rajala U, et al. Prevalence and associated factors of restless legs in a 57-year-old urban population in northern Finland. *Acta neurologica Scandinavica* 2010;**122**(1):63-9 doi: 10.1111/j.1600-0404.2009.01262.x[published Online First: Epub Date].
18. Wesstrom J, Nilsson S, Sundstrom-Poromaa I, Ulfberg J. Restless legs syndrome among women: prevalence, co-morbidity and possible relationship to menopause. *Climacteric : the journal of the International Menopause Society* 2008;**11**(5):422-8 doi: 10.1080/13697130802359683[published Online First: Epub Date].
19. Winkelman JW, Finn L, Young T. Prevalence and correlates of restless legs syndrome symptoms in the Wisconsin Sleep Cohort. *Sleep medicine* 2006;**7**(7):545-52 doi: 10.1016/j.sleep.2006.01.004[published Online First: Epub Date].
20. Winkelman JW, Shahar E, Sharief I, Gottlieb DJ. Association of restless legs syndrome and cardiovascular disease in the Sleep Heart Health Study. *Neurology* 2008;**70**(1):35-42 doi: 10.1212/01.wnl.0000287072.93277.c9[published Online First: Epub Date].
21. Winter AC, Schurks M, Glynn RJ, et al. Restless legs syndrome and risk of incident cardiovascular disease in women and men: prospective cohort study. *BMJ open* 2012;**2**(2):e000866 doi: 10.1136/bmjopen-2012-000866[published Online First: Epub Date].
22. Dong M, Wu Z, Lu M, Wang Z, Li Z. Combining the physical adsorption approach and the covalent attachment method to prepare a bifunctional bioreactor. *International journal of molecular sciences* 2012;**13**(9):11443-54 doi: 10.3390/ijms130911443[published Online First: Epub Date].
23. Liu H, Han Y, Fu H, et al. Construction and expression of sTRAIL-melittin combining enhanced anticancer activity with antibacterial activity in *Escherichia coli*. *Applied microbiology and biotechnology* 2013;**97**(7):2877-84 doi: 10.1007/s00253-012-4541-y[published Online First: Epub Date].
24. Li Y, Wang W, Winkelman JW, Malhotra A, Ma J, Gao X. Prospective study of restless legs syndrome and mortality among men. *Neurology* 2013;**81**(1):52-9
25. Walters AS, Moussouttas M, Siddiqui F, et al. Prevalence of stroke in Restless Legs Syndrome: Initial Results Point to the Need for More Sophisticated Studies. *The open neurology journal* 2010;**4**:73-7 doi: 10.2174/1874205X01004010073[published Online First: Epub Date].
26. Schurks M, Winter AC, Berger K, Buring JE, Kurth T. Migraine and restless legs syndrome in women. *Cephalalgia*; **32**(5):382-9
27. Winter AC, Schurks M, Berger K, Buring JE, Gaziano JM, Kurth T. Migraine and restless legs syndrome in men. *Cephalalgia*; **33**(2):130-5
28. Group CS. Vascular factors and risk of dementia: design of the Three-City Study and baseline characteristics of the study population. *Neuroepidemiology* 2003;**22**(6):316-25
29. Maillard P, Delcroix N, Crivello F, et al. An automated procedure for the assessment of white matter hyperintensities by multispectral (T1, T2, PD) MRI and an evaluation of its between-centre reproducibility based on two large community databases. *Neuroradiology* 2008;**50**(1):31-42 doi: 10.1007/s00234-007-0312-3[published Online First: Epub Date].
30. Soumare A, Elbaz A, Zhu Y, et al. White matter lesions volume and motor performances in the elderly. *Annals of neurology* 2009;**65**(6):706-15 doi: 10.1002/ana.21674[published Online First: Epub Date].
31. Zhu YC, Dufouil C, Soumare A, Mazoyer B, Chabriat H, Tzourio C. High degree of dilated Virchow-Robin spaces on MRI is associated with increased risk of dementia. *Journal of Alzheimer's disease : JAD* 2010;**22**(2):663-72 doi: 10.3233/JAD-2010-100378[published Online First: Epub Date].
32. Berger K, von Eckardstein A, Trenkwalder C, Rothdach A, Junker R, Weiland SK. Iron metabolism and the risk of restless legs syndrome in an elderly general population--the MEMO-Study. *Journal of neurology* 2002;**249**(9):1195-9 doi: 10.1007/s00415-002-0805-2[published Online First: Epub Date].

- 1  
2  
3 33. Hogl B, Kiechl S, Willeit J, et al. Restless legs syndrome: a community-based study of prevalence,  
4 severity, and risk factors. *Neurology* 2005;**64**(11):1920-4 doi:  
5 10.1212/01.WNL.0000163996.64461.A3[published Online First: Epub Date].  
6  
7 34. Report of the Expert Committee on the Diagnosis and Classification of Diabetes Mellitus. *Diabetes*  
8 *care* 1997;**20**(7):1183-97  
9  
10 35. Nocturnal limb movements are correlated with cerebral white matter hyperintensities. *American*  
11 *Academy of Neurology*; 2012; New Orleans, LA, USA.  
12  
13 36. Henskens LH, Kroon AA, van Oostenbrugge RJ, et al. Associations of ambulatory blood pressure  
14 levels with white matter hyperintensity volumes in hypertensive patients. *Journal of hypertension*  
15 2009;**27**(7):1446-52 doi: 10.1097/HJH.0b013e32832b5204[published Online First: Epub Date].  
16  
17 37. Elwood P, Hack M, Pickering J, Hughes J, Gallacher J. Sleep disturbance, stroke, and heart disease  
18 events: evidence from the Caerphilly cohort. *Journal of epidemiology and community health*  
19 2006;**60**(1):69-73 doi: 10.1136/jech.2005.039057[published Online First: Epub Date].  
20  
21 38. van Straaten EC, Fazekas F, Rostrup E, et al. Impact of white matter hyperintensities scoring method  
22 on correlations with clinical data: the LADIS study. *Stroke; a journal of cerebral circulation*  
23 2006;**37**(3):836-40 doi: 10.1161/01.STR.0000202585.26325.74[published Online First: Epub  
24 Date]].  
25  
26  
27  
28  
29  
30  
31  
32  
33  
34  
35  
36  
37  
38  
39  
40  
41  
42  
43  
44  
45  
46  
47  
48  
49  
50  
51  
52  
53  
54  
55  
56  
57  
58  
59  
60

Table 1. Characteristics of participants by RLS status.

| Characteristic (%)                 | No RLS<br>(n=1050) | RLS<br>(n=218) |
|------------------------------------|--------------------|----------------|
| Age (mean, SD)                     | 72.1 (4.1)         | 71.6 (3.8)     |
| Sex (% female)                     | 59.3               | 72.9           |
| Smoking status (%)                 |                    |                |
| Never                              | 60.0               | 67.0           |
| Past                               | 35.2               | 29.4           |
| Current                            | 4.8                | 3.7            |
| Alcohol consumption (%)            |                    |                |
| Non-drinker                        | 33.6               | 39.9           |
| 0 to ≤12 g/day                     | 41.1               | 45.0           |
| 12 to ≤24 g/day                    | 15.8               | 11.0           |
| >24 g/day                          | 9.2                | 4.1            |
| Physically active (%)              | 21.3               | 16.5           |
| Body mass index                    |                    |                |
| <25 kg/m <sup>2</sup>              | 45.3               | 44.5           |
| 25 to < 30 kg/m <sup>2</sup>       | 40.2               | 40.8           |
| ≥30 kg/m <sup>2</sup>              | 14.5               | 14.7           |
| History of high blood pressure (%) | 86.6               | 86.7           |
| History of high cholesterol (%)    | 63.6               | 59.6           |
| History of diabetes (%)            | 11.8               | 9.2            |

1  
2  
3  
4  
5  
6  
7  
8  
9  
10  
11  
12  
13  
14  
15  
16  
17  
18  
19  
20  
21  
22  
23  
24  
25  
26  
27  
28  
29  
30  
31  
32  
33  
34  
35  
36  
37  
38  
39  
40  
41  
42  
43  
44  
45  
46  
47  
48  
49  
50  
51  
52  
53  
54  
55  
56  
57  
58  
59  
60

|                                                  |      |      |
|--------------------------------------------------|------|------|
| History of cardiovascular disease (%)            | 18.1 | 17.9 |
| History of peripheral artery disease (%)         | 4.6  | 4.1  |
| History of leg operation (%)                     | 0.9  | 0.5  |
| History of edema/swelling of legs and ankles (%) | 29.0 | 36.7 |
| Difficulty sleeping                              |      |      |
| Never                                            | 47.5 | 44.0 |
| Rarely                                           | 30.2 | 20.2 |
| Regularly                                        | 10.8 | 17.0 |
| Often                                            | 10.8 | 18.8 |
| Quality of sleep                                 |      |      |
| Good                                             | 52.6 | 45.0 |
| Average                                          | 31.8 | 33.5 |
| Mediocre or bad                                  | 12.3 | 21.6 |
| Take medications for sleep                       | 35.2 | 45.0 |

\*Numbers may not add to 100% due to missing data.

List of abbreviations: RLS=restless legs syndrome, SD=standard deviation

Table 2. Cross-sectional age- and sex-adjusted and multivariable-adjusted\* associations between RLS and brain white matter lesion volumes.

| Total WML volume in tertiles           | No restless legs syndrome (n=1050) | Restless legs syndrome (n=218) | Age and sex-adjusted odds ratio (95% CI) | Multivariable-adjusted odds ratio (95% CI) |
|----------------------------------------|------------------------------------|--------------------------------|------------------------------------------|--------------------------------------------|
|                                        | N (%)                              | N (%)                          |                                          |                                            |
| Lowest Tertile                         | 343 (32.7)                         | 76 (34.9)                      | 1.00                                     | 1.00                                       |
| Middle Tertile                         | 348 (33.1)                         | 70 (32.1)                      | 0.95<br>(0.66, 1.36)                     | 0.95<br>(0.66, 1.37)                       |
| Highest Tertile                        | 359 (34.2)                         | 72 (33.0)                      | 1.00<br>(0.69, 1.45)                     | 1.00<br>(0.69, 1.46)                       |
| Periventricular WML volume in tertiles |                                    |                                |                                          |                                            |
| Lowest Tertile                         | 341 (32.5)                         | 77 (35.3)                      | 1.00                                     | 1.00                                       |
| Middle Tertile                         | 351 (33.4)                         | 68 (31.2)                      | 0.86<br>(0.49, 1.51)                     | 0.86<br>(0.49, 1.51)                       |
| Highest Tertile                        | 358 (34.1)                         | 73 (33.5)                      | 1.00<br>(0.46, 2.18)                     | 1.02<br>(0.47, 2.25)                       |

1  
2  
3  
4  
5  
6  
7  
8  
9  
10  
11  
12  
13  
14  
15  
16  
17  
18  
19  
20  
21  
22  
23  
24  
25  
26  
27  
28  
29  
30  
31  
32  
33  
34  
35  
36  
37  
38  
39  
40  
41  
42  
43  
44  
45  
46  
47  
48  
49  
50  
51  
52  
53  
54  
55  
56  
57  
58  
59  
60

---

|                    |            |           |              |              |
|--------------------|------------|-----------|--------------|--------------|
| Deep WML volume in |            |           |              |              |
| tertiles           |            |           |              |              |
| Lowest Tertile     | 352 (33.5) | 67 (30.7) | 1.00         | 1.00         |
| Middle Tertile     | 340 (32.4) | 77 (35.3) | 1.24         | 1.22         |
|                    |            |           | (0.84, 1.84) | (0.82, 1.81) |
| Highest Tertile    | 358 (34.1) | 74 (33.9) | 1.21         | 1.18         |
|                    |            |           | (0.76, 1.94) | (0.73, 1.90) |

---

\*Adjusted for age, sex, smoking status, alcohol consumption, physical activity, body mass index, history of hypertension, history of diabetes, history of cardiovascular disease, history of peripheral artery disease, history of leg operation, and history of edema/swelling of legs and ankles.



## STROBE Statement—checklist of items that should be included in reports of observational studies

|                              | Item No | Recommendation                                                                                                                                                                                                                                                                                                                                                                                                                                                         | Page  |
|------------------------------|---------|------------------------------------------------------------------------------------------------------------------------------------------------------------------------------------------------------------------------------------------------------------------------------------------------------------------------------------------------------------------------------------------------------------------------------------------------------------------------|-------|
| <b>Title and abstract</b>    | 1       | (a) Indicate the study's design with a commonly used term in the title or the abstract                                                                                                                                                                                                                                                                                                                                                                                 | 1, 5  |
|                              |         | (b) Provide in the abstract an informative and balanced summary of what was done and what was found                                                                                                                                                                                                                                                                                                                                                                    | 5     |
| <b>Introduction</b>          |         |                                                                                                                                                                                                                                                                                                                                                                                                                                                                        |       |
| Background/rationale         | 2       | Explain the scientific background and rationale for the investigation being reported                                                                                                                                                                                                                                                                                                                                                                                   | 7     |
| Objectives                   | 3       | State specific objectives, including any prespecified hypotheses                                                                                                                                                                                                                                                                                                                                                                                                       | 8     |
| <b>Methods</b>               |         |                                                                                                                                                                                                                                                                                                                                                                                                                                                                        |       |
| Study design                 | 4       | Present key elements of study design early in the paper                                                                                                                                                                                                                                                                                                                                                                                                                | 8     |
| Setting                      | 5       | Describe the setting, locations, and relevant dates, including periods of recruitment, exposure, follow-up, and data collection                                                                                                                                                                                                                                                                                                                                        | 8-11  |
| Participants                 | 6       | (a) <i>Cohort study</i> —Give the eligibility criteria, and the sources and methods of selection of participants. Describe methods of follow-up<br><i>Case-control study</i> —Give the eligibility criteria, and the sources and methods of case ascertainment and control selection. Give the rationale for the choice of cases and controls<br><i>Cross-sectional study</i> —Give the eligibility criteria, and the sources and methods of selection of participants | 8     |
|                              |         | (b) <i>Cohort study</i> —For matched studies, give matching criteria and number of exposed and unexposed<br><i>Case-control study</i> —For matched studies, give matching criteria and the number of controls per case                                                                                                                                                                                                                                                 | NA    |
| Variables                    | 7       | Clearly define all outcomes, exposures, predictors, potential confounders, and effect modifiers. Give diagnostic criteria, if applicable                                                                                                                                                                                                                                                                                                                               | 8-11  |
| Data sources/<br>measurement | 8*      | For each variable of interest, give sources of data and details of methods of assessment (measurement). Describe comparability of assessment methods if there is more than one group                                                                                                                                                                                                                                                                                   | 8-11  |
| Bias                         | 9       | Describe any efforts to address potential sources of bias                                                                                                                                                                                                                                                                                                                                                                                                              | 11,12 |
| Study size                   | 10      | Explain how the study size was arrived at                                                                                                                                                                                                                                                                                                                                                                                                                              | 8, 11 |
| Quantitative variables       | 11      | Explain how quantitative variables were handled in the analyses. If applicable, describe which groupings were chosen and why                                                                                                                                                                                                                                                                                                                                           | 8-11  |
| Statistical methods          | 12      | (a) Describe all statistical methods, including those used to control for confounding                                                                                                                                                                                                                                                                                                                                                                                  | 11-12 |
|                              |         | (b) Describe any methods used to examine subgroups and interactions                                                                                                                                                                                                                                                                                                                                                                                                    | NA    |
|                              |         | (c) Explain how missing data were addressed                                                                                                                                                                                                                                                                                                                                                                                                                            | 12    |
|                              |         | (d) <i>Cohort study</i> —If applicable, explain how loss to follow-up was addressed<br><i>Case-control study</i> —If applicable, explain how matching of cases and controls was addressed<br><i>Cross-sectional study</i> —If applicable, describe analytical methods taking account of sampling strategy                                                                                                                                                              | NA    |
|                              |         | (e) Describe any sensitivity analyses                                                                                                                                                                                                                                                                                                                                                                                                                                  | NA    |

| <b>Results</b>           |     |                                                                                                                                                                                                              |                |
|--------------------------|-----|--------------------------------------------------------------------------------------------------------------------------------------------------------------------------------------------------------------|----------------|
| Participants             | 13* | (a) Report numbers of individuals at each stage of study—eg numbers potentially eligible, examined for eligibility, confirmed eligible, included in the study, completing follow-up, and analysed            | 8,11, Table 1  |
|                          |     | (b) Give reasons for non-participation at each stage                                                                                                                                                         | 8, 11          |
|                          |     | (c) Consider use of a flow diagram                                                                                                                                                                           | NA             |
| Descriptive data         | 14* | (a) Give characteristics of study participants (eg demographic, clinical, social) and information on exposures and potential confounders                                                                     | Table 1        |
|                          |     | (b) Indicate number of participants with missing data for each variable of interest                                                                                                                          | 12             |
|                          |     | (c) <i>Cohort study</i> —Summarise follow-up time (eg, average and total amount)                                                                                                                             | NA             |
| Outcome data             | 15* | <i>Cohort study</i> —Report numbers of outcome events or summary measures over time                                                                                                                          |                |
|                          |     | <i>Case-control study</i> —Report numbers in each exposure category, or summary measures of exposure                                                                                                         |                |
|                          |     | <i>Cross-sectional study</i> —Report numbers of outcome events or summary measures                                                                                                                           | Table 2        |
| Main results             | 16  | (a) Give unadjusted estimates and, if applicable, confounder-adjusted estimates and their precision (eg, 95% confidence interval). Make clear which confounders were adjusted for and why they were included | 12-13, Table 2 |
|                          |     | (b) Report category boundaries when continuous variables were categorized                                                                                                                                    | 9-12           |
|                          |     | (c) If relevant, consider translating estimates of relative risk into absolute risk for a meaningful time period                                                                                             | NA             |
| Other analyses           | 17  | Report other analyses done—eg analyses of subgroups and interactions, and sensitivity analyses                                                                                                               | NA             |
| <b>Discussion</b>        |     |                                                                                                                                                                                                              |                |
| Key results              | 18  | Summarise key results with reference to study objectives                                                                                                                                                     | 13             |
| Limitations              | 19  | Discuss limitations of the study, taking into account sources of potential bias or imprecision. Discuss both direction and magnitude of any potential bias                                                   | 15             |
| Interpretation           | 20  | Give a cautious overall interpretation of results considering objectives, limitations, multiplicity of analyses, results from similar studies, and other relevant evidence                                   | 13-15          |
| Generalisability         | 21  | Discuss the generalisability (external validity) of the study results                                                                                                                                        | 15             |
| <b>Other information</b> |     |                                                                                                                                                                                                              |                |
| Funding                  | 22  | Give the source of funding and the role of the funders for the present study and, if applicable, for the original study on which the present article is based                                                | 2-3            |

\*Give information separately for cases and controls in case-control studies and, if applicable, for exposed and unexposed groups in cohort and cross-sectional studies.

**Note:** An Explanation and Elaboration article discusses each checklist item and gives methodological background and published examples of transparent reporting. The STROBE checklist is best used in conjunction with this article (freely available on the Web sites of PLoS Medicine at <http://www.plosmedicine.org/>, Annals of Internal Medicine at <http://www.annals.org/>, and Epidemiology at <http://www.epidem.com/>). Information on the STROBE Initiative is available at [www.strobe-statement.org](http://www.strobe-statement.org).

# BMJ Open

## Structural Brain Lesions and Restless Legs Syndrome: A cross-sectional population-based study

|                                 |                                                                                                                                                                                                                                                                                                                                                                                                                                                                                                                                                                                                                                                                                                                                                                                                                                                                           |
|---------------------------------|---------------------------------------------------------------------------------------------------------------------------------------------------------------------------------------------------------------------------------------------------------------------------------------------------------------------------------------------------------------------------------------------------------------------------------------------------------------------------------------------------------------------------------------------------------------------------------------------------------------------------------------------------------------------------------------------------------------------------------------------------------------------------------------------------------------------------------------------------------------------------|
| Journal:                        | <i>BMJ Open</i>                                                                                                                                                                                                                                                                                                                                                                                                                                                                                                                                                                                                                                                                                                                                                                                                                                                           |
| Manuscript ID:                  | bmjopen-2014-005938.R1                                                                                                                                                                                                                                                                                                                                                                                                                                                                                                                                                                                                                                                                                                                                                                                                                                                    |
| Article Type:                   | Research                                                                                                                                                                                                                                                                                                                                                                                                                                                                                                                                                                                                                                                                                                                                                                                                                                                                  |
| Date Submitted by the Author:   | 23-Jul-2014                                                                                                                                                                                                                                                                                                                                                                                                                                                                                                                                                                                                                                                                                                                                                                                                                                                               |
| Complete List of Authors:       | Rist, Pamela; Brigham and Women's Hospital, Division of Preventive Medicine<br>Tzourio, Christophe; INSERM Research Center for Epidemiology and Biostatistics (U897), Team Neuroepidemiology<br>Elbaz, Alexis; INSERM Centre for Research in Epidemiology and Population Health U1018, Social and occupational determinants of health F-94807<br>Soumare, Aicha; INSERM Research Center for Epidemiology and Biostatistics (U897), Team Neuroepidemiology<br>Dufouil, Carole; INSERM Research Center for Epidemiology and Biostatistics (U897), Team Neuroepidemiology<br>Mazoyer, Bernard; College of Health Science, University of Bordeaux, CNRS CEA (UMR5296) Neurofunctional Imaging Group<br>Kurth, Tobias; INSERM Research Center for Epidemiology and Biostatistics (U897), Team Neuroepidemiology; Brigham and Women's Hospital, Division of Preventive Medicine |
| <b>Primary Subject Heading</b>: | Epidemiology                                                                                                                                                                                                                                                                                                                                                                                                                                                                                                                                                                                                                                                                                                                                                                                                                                                              |
| Secondary Subject Heading:      | Neurology                                                                                                                                                                                                                                                                                                                                                                                                                                                                                                                                                                                                                                                                                                                                                                                                                                                                 |
| Keywords:                       | Epidemiology < TROPICAL MEDICINE, restless legs syndrome, MRI                                                                                                                                                                                                                                                                                                                                                                                                                                                                                                                                                                                                                                                                                                                                                                                                             |
|                                 |                                                                                                                                                                                                                                                                                                                                                                                                                                                                                                                                                                                                                                                                                                                                                                                                                                                                           |

SCHOLARONE™  
Manuscripts

1  
2  
3 **Structural Brain Lesions and Restless Legs Syndrome: A cross-sectional population-based**  
4  
5  
6 **study**  
7

8 Pamela M. Rist, ScD, Christophe Tzourio, MD, PhD, Alexis Elbaz, MD, PhD, Aïcha Soumaré,  
9  
10 PhD, Carole Dufouil, PhD, Bernard Mazoyer, MD, PhD, Tobias Kurth, MD, ScD  
11  
12  
13  
14  
15

16 From the Division of Preventive Medicine (P.M.R., T.K.), Department of Medicine, Brigham  
17 and Women's Hospital, Harvard Medical School, Boston, MA; the Department of Social and  
18 Behavioral Sciences (P.M.R.) and the Department of Epidemiology (P.M.R., T.K.), Harvard  
19 School of Public Health, Boston, MA; INSERM Research Center for Epidemiology and  
20 Biostatistics (U897)– Team Neuroepidemiology (C.T., A.S., C.D., T.K.), Bordeaux, France,  
21 INSERM, Centre for Research in Epidemiology and Population Health, U1018, Social and  
22 occupational determinants of health, F-94807 (A.E.), Villejuif, France; Université de Versailles  
23 St-Quentin, UMRS 1018, F-78035 (A.E.), Versailles, France; CNRS CEA (UMR5296)  
24 Neurofunctional Imaging Group, College of Health Sciences, University of Bordeaux (B.M.),  
25 Bordeaux, France; and College of Health Sciences, University of Bordeaux (T.K., C.T., C.D.),  
26  
27  
28  
29  
30  
31  
32  
33  
34  
35  
36  
37  
38  
39  
40  
41  
42  
43  
44  
45  
46  
47  
48  
49  
50  
51  
52  
53  
54  
55  
56  
57  
58  
59  
60

Corresponding Author:

Tobias Kurth, MD, ScD

Inserm Research Center for Epidemiology and Biostatistics (U897) - Team Neuroepidemiology

University of Bordeaux

146 rue Léo Saignat - CS61292, 33076

Bordeaux, France

1  
2  
3 p: [+33 5 47 30 42 56](tel:+33547304256)

4  
5  
6 e: [tobias.kurth@u-bordeaux.fr](mailto:tobias.kurth@u-bordeaux.fr)

7  
8  
9  
10 Alternate Corresponding Author:

11  
12  
13 Pamela M. Rist

14  
15  
16 900 Commonwealth Avenue, 3rd floor

17  
18  
19 Boston, MA 02215

20  
21  
22 Tel: (617) 278-0878

23  
24  
25 Fax: (617) 731-3843

26  
27  
28 E-mail: [prist@mail.harvard.edu](mailto:prist@mail.harvard.edu)

29  
30  
31  
32  
33  
34  
35  
36  
37 **Key words:** Epidemiology, Restless Legs Syndrome, MRI

38  
39  
40 **Running head:** Structural Brain Lesions and Restless Legs Syndrome

**Abstract**

**Objective:** To evaluate the association between white matter lesion volume, silent infarcts, and restless legs syndrome in a population-based study of elderly individuals.

**Design:** Cross-sectional study

**Setting:** Population-based Three-City study

**Participants:** 1035 individuals from the Dijon, France center of the Three-City study who had available information on volume of white matter lesions (WML) from MRI scans and who answered questions about the prevalence of restless legs syndrome

**Primary Outcome Measure:** Prevalence of restless legs syndrome

**Results:** White matter lesion volume was measured using an automated tissue segmentation method. Logistic regression was used to evaluate adjusted associations between tertiles of WML volume and restless legs syndrome and between silent infarcts and restless legs syndrome. 218 individuals (21.1%) were determined to have restless legs syndrome. Compared to those in the first tertile of WML volume, individuals in the second tertile (OR=1.09; 95% CI: 0.75, 1.60) or third tertile (OR=1.17; 95% CI: 0.79, 1.74) did not have an increased prevalence of restless legs syndrome. We also did not observe associations between the volume of deep or periventricular WML and restless legs syndrome; nor did we observe an association between silent brain infarcts and RLS (OR=0.74; 95% CI: 0.40, 1.39). These findings were not modified by age or gender.

**Conclusion:** Higher volume of WML and the presence of silent infarcts were not associated with an increased prevalence of restless legs syndrome in this population-based cohort of elderly individuals.

## Article Summary

### Article focus

- The aim of this study is to evaluate the association between white matter lesion volume, silent infarcts, and restless legs syndrome (RLS) in a population-based study of elderly individuals.

### Key messages

- We found no cross-sectional association between WML volume or brain infarcts and RLS. The results of this study do not support an association between RLS and vascular brain lesions.

### Strengths and limitations of this study

- Strengths include the population-based setting with available brain imaging, the size of the cohort, standardized assessment of RLS using criteria from the International Restless Legs Study Group and use of an automated measurement procedure to quantify and localize WML.
- Limitations to this study include its cross-sectional design, lack of information on kidney disease or iron deficiency for participants, and self-reported information on RLS. Additionally, RLS status was not assessed at baseline and participants who were still in the study at restless legs assessment may be healthier than participants who died or dropped out prior to RLS assessment.

## Introduction

Restless legs syndrome (RLS) is a neurological disorder that originates in the motoneurons of the brain and is characterized by an urge to move the legs and unpleasant leg sensations. Population based studies using the minimal diagnostic criteria from the International Restless Legs Syndrome Study Group[1 2] have found the prevalence of RLS ranges from 6% to 12% with women being affected twice as often as men.[3] In addition, the prevalence of RLS increases with age.[3] While the causes of RLS are unknown, some studies have suggested that dysfunction of the dopaminergic system may contribute to disease development. However, neuroimaging studies have not shown any primary neurodegeneration of dopaminergic neurons in the substantia nigra.[4] A large genetics consortium study has found some genetic variants that may be associated with the development of RLS.[5]

Several studies have found associations between cardiovascular risk factors including smoking[6-10], diabetes[7 9 11], hypercholesterolemia[9 10], exercise[9], body mass index[6 9 12 13] and hypertension[7 14 15] and RLS. These associations have led to the hypothesis that RLS may be a risk factor for cardiovascular disease. However, evidence for an association between RLS and incident cardiovascular disease is mixed.[6 9 11 15-20] One recent longitudinal study did not find evidence of an association between RLS and incident cardiovascular disease[21] while another found an association between RLS and coronary heart disease[22] and mortality.[23] Several possible biological mechanisms have been proposed to explain why RLS may be associated with high blood pressure, heart disease, and stroke. RLS is associated with sympathetic hyperactivity which may lead to daytime hypertension which itself is a risk factor for heart disease and stroke. Alternatively, even if the sympathetic hyperactivity does not lead to daytime hypertension, it may impact atherosclerotic plaque formation and rupture which could



1  
2  
3 lead to heart disease and stroke. Other comorbidities associated with RLS may also be risk  
4  
5 factors for heart disease and stroke.[24] In addition to its association with cardiovascular risk  
6  
7 factors, RLS is also associated with migraine in both men and women.[25 26]  
8  
9

10  
11 Given the association of RLS with several vascular risk factors as well as with migraine,  
12  
13 we were interested to know if white matter lesions (WML), which are also strongly related to  
14  
15 vascular risk factors, including migraine, and cardiovascular disease, were associated with RLS.  
16  
17 Using a population-based cohort of elderly individuals residing in France, we examined the  
18  
19 cross-sectional association between white matter lesion volume and RLS prevalence.  
20  
21  
22  
23

## 24 **Methods**

25  
26  
27 The Three-City (3C) is a longitudinal cohort study enrolling subjects living in three  
28  
29 French cities (Bordeaux, Dijon, and Montpellier) designed to estimate the risk of dementia and  
30  
31 cognitive impairment attributable to vascular risk factors.[27] The present analysis only uses data  
32  
33 from subjects living in Dijon because data on RLS were only collected in that city. Each subject  
34  
35 signed an informed consent statement and the Ethical Committee of the University Hospital of  
36  
37 Kremlin-Bicêtre approved the methods and procedures of the 3C study.  
38  
39  
40  
41

42 To be eligible for the 3C study, the participant needs to live in Dijon, be registered on the  
43  
44 electoral rolls in 1999, be 65 years of older, and not be institutionalized. A total of 4,931  
45  
46 individuals were recruited at the Dijon site between 1999 and 2001. For the MRI sub-study, all  
47  
48 subjects recruited from the Dijon center who were <80 years of age and enrolled between June  
49  
50 1999 and September 2000 were eligible to participate. Of those eligible, 2,285 (82%) subjects  
51  
52 agreed to participate in the MRI study, but only 1,924 scans could be performed at baseline due  
53  
54 to financial constraints.  
55  
56  
57  
58  
59  
60

1  
2  
3 The process of obtaining the MRI information has been described in detail elsewhere.[28  
4  
5 29] In brief, MRI scans were obtained using a 1.5T Magnetom (Siemens, Erlangen, Germany). A  
6  
7 3-dimensional (3D) high-resolution T1-weighted brain volume was obtained using a 3D  
8  
9 inversion recovery fast spoiled-gradient echo sequence. T2- and proton density (PD)-weighted  
10  
11 brain volumes were acquired using a 2-dimensional dual spin echo sequences with two echo  
12  
13 times. Each subject dataset (T1, T2, PD) was reconstructed and visually checked for major  
14  
15 artifacts before being stored.  
16  
17  
18  
19

20  
21 A fully-automated image processing software was used to detect, measure, and localize  
22  
23 WMLs. The process has been described in detail previously[28 29]. Based on the morphologic  
24  
25 parameters (center of mass coordinates, Euclidian distance to the ventricular system, principal  
26  
27 axes dimension), each WML was labeled as being either periventricular if the distance to the  
28  
29 ventricular system was <10 mm or deep otherwise. Total volume of periventricular and deep  
30  
31 WMLs were estimated by summing the volumes of all periventricular and deep lesions.  
32  
33  
34  
35

36 We log transformed the values of total WML, periventricular WML, deep WML, and  
37  
38 total white matter volume as they were not normally distributed. We then divided the log  
39  
40 transformed values into tertiles to allow for non-linear associations between WML volumes and  
41  
42 RLS.  
43  
44  
45

46 Infarcts were rated on T1, T2, and PD-weighted images and defined as focal lesions  $\geq 3$   
47  
48 mm in diameter with the same signal characteristic as cerebrospinal fluid on all sequences. They  
49  
50 were discriminated from dilated Virchow-Robin spaces using multi-planar reformatting. Those  
51  
52 with a typical vascular shape and following the orientation of perforating vessels were classified  
53  
54 as dilated Virchow-Robin spaces and not as infarcts.[30]  
55  
56  
57  
58  
59  
60

### *Restless Legs Syndrome Assessment*

RLS was assessed at the fifth and sixth follow-up waves of the study. Participants were asked a series of questions designed to address the four minimal diagnostic criteria of the International Restless Legs Study Group which has been established and validated in previous studies.[31 32] The participants were asked: “Have you ever felt unpleasant sensation in the legs (restlessness, tingling, tension, annoyance, annoyances, contractions, twitching, numbness, electricity, etc.) with the irresistible need or want to move?” Response options were yes or no. If the participant responded “yes”, he or she was further asked: “Do these unpleasant sensations occur solely or mainly at rest (when you are sitting or lying down, without moving your legs) and do they improve with movement?” and “Are these unpleasant sensations more intense in the evening or at night than in the morning?” Response options for these questions were yes or no. If the participant responded yes to all three questions, he or she was defined as having RLS.

### *Covariates*

Trained psychologists collected sociodemographic and medical data on participants during home visits. Participants were asked if they were treated for various co-morbidities at baseline and in the fifth and sixth wave of the study. We used all available information from baseline to RLS assessment to determine a subject’s co-morbidity history. History of cardiovascular disease was defined as a history of myocardial infarction, stroke, angina, percutaneous transluminal coronary angioplasty, or coronary artery bypass surgery. History of diabetes was defined as glycemia  $\geq 7$  mmol/L or use of anti-diabetic treatment.[33] High blood pressure was defined as measured systolic blood pressure  $\geq 140$  mmHg or measured diastolic blood pressure  $\geq 90$  mmHg. High cholesterol was defined as lipid lowering treatment or

1  
2  
3 cholesterol  $\geq 6.2$  mmol/L. Information was also collected on history of peripheral artery disease,  
4  
5 history of leg operation, and history of edema/swelling of legs and ankles.  
6  
7

8 For the following covariates, we used values from the follow-up waves during which  
9  
10 RLS was assessed: body mass index, smoking status, alcohol consumption and physical activity.  
11  
12 If this value was missing, we used values from baseline. Height and weight were used to  
13  
14 calculate body mass index. Smoking status was reported as never, past, or current, and alcohol  
15  
16 consumption was measured in grams per day. Due to changes in the questionnaires on physical  
17  
18 activity over time, we classified participants as active versus non-active.  
19  
20  
21  
22

### 23 *Statistical Analysis*

24  
25  
26 Of the 1924 individuals in the MRI sub-study, 1189 were still alive and participating in  
27  
28 the 3C study during the waves in which RLS was assessed. We excluded 97 participants who  
29  
30 did not answer any of the questions about RLS and the 57 participants who did not have data on  
31  
32 total WML volume, leaving a total of 1035 participants eligible for our analyses of which 218  
33  
34 (21.1%) reported RLS (Figure 1).  
35  
36  
37  
38

39 We performed a cross-sectional analysis using logistic regression to calculate odds ratios  
40  
41 and 95% confidence intervals of reporting RLS for each tertile of the WML volumes using the  
42  
43 lowest tertile as the reference group. Analyses examining the association between tertiles of total  
44  
45 WML volume and RLS adjusted for tertiles of total white matter as the likelihood of WML  
46  
47 correlates with the size of the total white matter. Analyses examining the association between  
48  
49 tertiles of periventricular or deep WML and RLS adjusted for tertiles of WML. We also used  
50  
51 logistic regression to examine the association between any brain silent infarct and RLS. For the  
52  
53 infarct analyses, we excluded participants with a brain tumor detected at MRI.  
54  
55  
56  
57  
58  
59  
60

1  
2  
3 We performed age- and sex-adjusted analyses and multivariable-adjusted analyses. Our  
4 multivariable analyses adjusted for age (continuous), sex, smoking status (never, past, or current  
5 smoker), alcohol consumption (0, 0 to  $\leq 12$ , 12 to  $\leq 24$ , and  $> 24$  grams/day), physical activity  
6 (active versus not active), body mass index ( $< 25$  kg/m<sup>2</sup>, 25 to  $< 30$  kg/m<sup>2</sup>, and  $\geq 30$  kg/m<sup>2</sup>), history  
7 of hypertension (yes/no), history of diabetes (yes/no), history of cardiovascular disease (yes/no),  
8 history of peripheral artery disease (yes/no), history of leg operation (yes/no), and history of  
9 edema/swelling of legs and ankles (yes/no). Further adjustment for measures of sleep quality,  
10 difficulty sleeping and taking sleep medications did not affect our results (results not shown).  
11 All covariates were measured at baseline. Less than 39 people were missing information on any  
12 covariate, except for difficulty sleeping and were assigned to the reference value of that  
13 covariate. We created a separate category for those missing information on difficulty sleeping.  
14 We also performed separate age-adjusted analyses stratified by sex or mean age (72 years).  
15  
16  
17  
18  
19  
20  
21  
22  
23  
24  
25  
26  
27  
28  
29  
30  
31

32 We considered a two-tailed p value of  $< 0.05$  as statistically significant and used SAS 9.3  
33 as statistical software (Cary, NC).  
34  
35  
36  
37

## 38 Results

39  
40  
41 The characteristics of the participants by RLS status can be seen in Table 1. Those who  
42 reported RLS were more likely to be female, never smokers, non-drinkers, and were less  
43 physically active than those who did not report RLS.  
44  
45  
46  
47  
48

49 We did not observe an association between tertiles of WML and RLS (Table 2).  
50 Compared to those in the lowest tertile of WML, the multivariable-adjusted odds ratio of  
51 reporting RLS was 1.09 (95% CI: 0.75, 1.60) for those in the second tertile and 1.17 (95% CI:  
52  
53  
54  
55  
56  
57  
58  
59  
60

1  
2  
3 0.79, 1.74) for those in the top tertile. We also did not observe an association between tertiles of  
4  
5 deep or periventricular WML and RLS (Table 2).  
6  
7

8  
9 We also performed age-adjusted analyses stratified by sex or mean age (72 years).  
10  
11 Among men, compared to those in the lowest tertile of WML, the age-adjusted odds ratio of  
12 reporting RLS was 0.74 (95% CI: 0.35, 1.56) for those in the second tertile and 0.85 (95% CI:  
13 0.41, 1.77) for those in the top tertile. Among women, compared to those in the lowest tertile of  
14 WML, the age-adjusted odds ratio of reporting RLS was 1.17 (95% CI: 0.76, 1.81) for those in  
15 the second tertile and 1.13 (95% CI: 0.72, 1.78) for those in the top tertile. For those under 72  
16 years of age, the age-adjusted odds ratio of reporting RLS was 0.99 (95% CI: 0.61, 1.62) for  
17 those in the second tertile and 1.03 (95% CI: 0.61, 1.75) for those in the top tertile compared to  
18 those in the lowest tertile of WML. For those 72 years of age or older, the age-adjusted odds  
19 ratio of reporting RLS was 1.10 (95% CI: 0.61, 1.98) for those in the second tertile and 1.20  
20 (95% CI: 0.68, 2.10) for those in the top tertile compared to those in the lowest tertile of WML.  
21  
22  
23  
24  
25  
26  
27  
28  
29  
30  
31  
32  
33  
34  
35

36 We also explored whether there was an association between infarcts and RLS. Of the  
37 1330 people with information on brain infarcts, 131 had a brain infarct and 225 reported RLS.  
38 The age- and sex-adjusted odds ratio between infarcts and RLS was 0.42 (95% CI: 0.15, 1.21).  
39 The multivariable-adjusted odds ratios between infarcts and RLS was 0.74 (95% CI: 0.40, 1.39).  
40  
41  
42  
43  
44  
45  
46  
47

## 48 **Discussion**

49  
50 In this large, population-based study of elderly individuals, we found no cross-sectional  
51 association between WML volume or brain infarcts and RLS. The results of this study do not  
52 support an association between RLS and vascular brain lesions.  
53  
54  
55  
56  
57  
58  
59  
60

1  
2  
3  
4  
5  
6  
7  
8  
9  
10  
11  
12  
13  
14  
15  
16  
17  
18  
19  
20  
21  
22  
23  
24  
25  
26  
27  
28  
29  
30  
31  
32  
33  
34  
35  
36  
37  
38  
39  
40  
41  
42  
43  
44  
45  
46  
47  
48  
49  
50  
51  
52  
53  
54  
55  
56  
57  
58  
59  
60

Previous research on the association between WML volume and RLS is limited. A small study of 45 patients found that white matter hyperintensities were correlated with total limb movements per hour of sleep after adjusting for hypertension ( $r=0.66$ ,  $p=0.01$ ).<sup>[34]</sup> The authors suggest that leg movements may be associated with poor quality sleep which may contribute to episodes of nocturnal hypertension. Although nocturnal hypertension has been associated with the development of white matter hyperintensities even among those with daytime hypertension<sup>[35]</sup>, this study did not present results on the association between RLS and white matter hyperintensities. Additionally, it is unclear if the authors adjusted for other potential confounders including age and sex.

Another study using data from the Memory and Morbidity in Augsburg Elderly Study (MEMO) examined the association between RLS and brain lesions detected using MRI. They found a non-significant increase risk of silent infarction (OR=2.11, 95% CI: 0.71-6.27) and subcortical brain lesions greater than or equal to 10mm (OR=1.35, 95% CI: 0.56-3.22) in those who reported RLS compared to those without RLS.<sup>[24]</sup> The small size of this study (26 RLS cases and 241 controls) and limited power to control for confounding by cardiovascular risk factors may explain some of the differences between the results of the MEMO study and our study.

While evidence for a direct association between WML and RLS is limited, some cross-sectional studies have suggested that RLS may be associated with hypertension<sup>[14]</sup>, stroke<sup>[9 36]</sup>, and migraine<sup>[25 26]</sup>, which are associated with WML. However, a recent longitudinal study found no association between RLS and incident cardiovascular disease <sup>[21]</sup> and not all cross-sectional studies have found associations between hypertension and RLS.<sup>[9 11]</sup> Our study did not find an association between RLS and structural brain lesions which are strongly related to

1  
2  
3 vascular risk factors and cardiovascular disease. This observation aligns with the previous study  
4  
5 that did not find an association between RLS and incident cardiovascular disease.  
6  
7

8  
9 This study has several strengths including the population-based setting with available  
10 brain imaging, the size of the cohort, and standardized assessment of RLS using criteria from the  
11 International Restless Legs Study Group.[1 2] We also used an automated measurement  
12 procedure to quantify and localize WML. Compared to visual scale, automated procedures are  
13 not subject to a ceiling effect, permit better discrimination of lesion volume, and are more  
14 sensitive in detecting small group differences.[37]  
15  
16  
17  
18  
19  
20  
21  
22  
23

24 Limitations to this study include its cross-sectional design which prevents us from  
25 determining the temporal ordering of RLS and WML or examining how RLS may impact WML  
26 progression over time. RLS was first assessed in the fifth and sixth waves of the study  
27 (approximately 10 years after baseline). Participants who were still in the study then may be  
28 healthier than participants who died or dropped out prior to RLS assessment. We did not have  
29 information on kidney disease or iron deficiency for participants, which may be related to RLS.  
30 Information on RLS was self-reported and potential misclassification is possible. However, we  
31 used the best available questionnaire for population-level assessment of RLS and this  
32 questionnaire has been validated in previous cohorts.[31 32] Additionally, our questionnaire did  
33 not assess RLS severity or periodic limb movements association with RLS so we are unable to  
34 determine if the severity of RLS or presence of periodic limb movements may modify the  
35 association between RLS and WMH.  
36  
37  
38  
39  
40  
41  
42  
43  
44  
45  
46  
47  
48  
49  
50  
51  
52  
53  
54  
55  
56  
57  
58  
59  
60



1  
2  
3 While our data do not support a strong association between structural brain lesions and  
4  
5 RLS, further targeted research is warranted to evaluate whether subgroups of patients with RLS  
6  
7 exist who are at increased risk for structural brain lesions.  
8  
9

### 10 11 **Authorship Contributions**

12  
13  
14 Pamela M. Rist: drafting/revising the manuscript for content, including medical writing for  
15  
16 content; study concept or design; and analysis or interpretation of data  
17  
18

19  
20  
21 Christophe Tzourio: obtaining funding, interpretation of data, revising the manuscript for  
22  
23 content, and supervision  
24  
25

26  
27 Alexis Elbaz: interpretation of data and revising the manuscript for content  
28  
29

30  
31 Aicha Soumare: interpretation of data and revising the manuscript for content  
32  
33

34  
35 Carole Dufouil: interpretation of data and revising the manuscript for content  
36  
37

38  
39 Bernard Mazoyer: interpretation of data and revising the manuscript for content  
40  
41

42  
43 Tobias Kurth: Conception and design, interpretation of data, revising the manuscript for content,  
44  
45 and supervision

46 All authors have approved the final version of the manuscript and agree to be accountable for all  
47  
48 aspects of the work in ensuring that questions related to the accuracy or integrity of any part of  
49  
50 the work are appropriately investigated and resolved.  
51  
52

### 53 **Study Funding:**

54  
55  
56  
57  
58  
59  
60

1  
2  
3 The 3C study is conducted under a partnership agreement between the Institut National de la  
4 Santé et de la Recherche Médicale (INSERM), the Victor Segalen–Bordeaux II University, and  
5 the Sanofi-Synthélabo Company. The Fondation pour la Recherche Médicale funded the  
6 preparation and initiation of the study. The 3C Study is also supported by the Caisse Nationale  
7 Maladie des Travailleurs Salariés, Direction Générale de la Santé, Haute Autorité de la Santé,  
8 Institut National de Prévention et d'Education pour la Santé, Conseils Régionaux of Bourgogne,  
9 Fondation de France, Ministry of Research-INSERM Program “Cohortes et collections de  
10 données biologiques,” Mutuelle Générale de l'Education Nationale, Institut de  
11 la Longévité, Conseil Général de la Côte d'or. Pamela M. Rist was supported by the Rose  
12 Traveling Fellowship Program in Chronic Disease Epidemiology and Biostatistics from the  
13 Harvard School of Public Health.  
14  
15  
16  
17  
18  
19  
20  
21  
22  
23  
24  
25  
26  
27  
28  
29  
30  
31

### 32 **Full Author Disclosures:**

33  
34 Pamela M. Rist has received within the last 2 years funding from a training grant from the  
35 National Institute of Aging and from the Rose Traveling Fellowship Program in Chronic Disease  
36 Epidemiology and Biostatistics from the Harvard School of Public Health.  
37  
38

39  
40  
41 Christophe Tzourio has received fees from the Fondation Plan Alzheimer, the Fondation de  
42 Recherche sur l'Hypertension Artérielle, and ABBOTT for participating in scientific committees.  
43  
44 He has also received investigator-initiated research funding from the French National Research  
45 Agency (ANR) and the Fondation Plan Alzheimer for the 3C study.  
46  
47  
48  
49

50  
51 Tobias Kurth has received within the last 2 years investigator-initiated research funding from the  
52 French National Research Agency, and the US National Institutes of Health. Further, he has  
53  
54  
55  
56  
57  
58  
59  
60

1  
2  
3 received honoraria from the American Academy of Neurology for educational lectures and from  
4  
5 the *BMJ* and *Cephalalgia* for editorial services.  
6  
7

8 Alexis Elbaz has received within the last 2 years investigator-initiated research funding unrelated  
9  
10 to this project from the French National Research Agency, EU Joint Programme –  
11  
12 Neurodegenerative Disease Research (JPND), the French Agency for Drug Security (ANSM),  
13  
14 and the French Institute for Research in Public Health (IRESP).  
15  
16

17 Aicha Soumare has no disclosures.  
18

19 Carole Dufouil has received honoraria from the American Academy of Neurology for  
20  
21 educational lectures and from Eisai, Inc. for providing methodological expertise.  
22  
23

24 Bernard Mazoyer has no disclosures.  
25  
26

27  
28  
29 **Data sharing:**  
30

31 No additional data available.  
32  
33  
34  
35  
36  
37  
38  
39  
40  
41  
42  
43  
44  
45  
46  
47  
48  
49  
50  
51  
52  
53  
54  
55  
56  
57  
58  
59  
60

## References

1. Allen RP, Picchiatti D, Hening WA, et al. Restless legs syndrome: diagnostic criteria, special considerations, and epidemiology. A report from the restless legs syndrome diagnosis and epidemiology workshop at the National Institutes of Health. *Sleep medicine* 2003;**4**(2):101-19
2. Walters AS. Toward a better definition of the restless legs syndrome. The International Restless Legs Syndrome Study Group. *Movement disorders : official journal of the Movement Disorder Society* 1995;**10**(5):634-42 doi: 10.1002/mds.870100517[published Online First: Epub Date]].
3. Berger K, Kurth T. RLS epidemiology--frequencies, risk factors and methods in population studies. *Movement disorders : official journal of the Movement Disorder Society* 2007;**22** **Suppl 18**:S420-3 doi: 10.1002/mds.21589[published Online First: Epub Date]].
4. Paulus W, Dowling P, Rijsman R, et al. Pathophysiological concepts of restless legs syndrome. *Movement disorders : official journal of the Movement Disorder Society* 2007;**22**(10):1451-6 doi: 10.1002/mds.21533[published Online First: Epub Date]].
5. Winkelmann J, Schormair B, Lichtner P, et al. Genome-wide association study of restless legs syndrome identifies common variants in three genomic regions. *Nature genetics* 2007;**39**(8):1000-6 doi: 10.1038/ng2099[published Online First: Epub Date]].
6. Ohayon MM, Roth T. Prevalence of restless legs syndrome and periodic limb movement disorder in the general population. *Journal of psychosomatic research* 2002;**53**(1):547-54
7. Phillips B, Young T, Finn L, et al. Epidemiology of restless legs symptoms in adults. *Archives of internal medicine* 2000;**160**(14):2137-41

- 1  
2  
3 8. Sevim S, Dogu O, Camdeviren H, et al. Unexpectedly low prevalence and unusual  
4  
5 characteristics of RLS in Mersin, Turkey. *Neurology* 2003;**61**(11):1562-9  
6  
7
- 8 9. Winter AC, Schurks M, Glynn RJ, et al. Vascular risk factors, cardiovascular disease, and  
9  
10 restless legs syndrome in women. *The American journal of medicine* 2013;**126**(3):220-7,  
11  
12 27 e1-2 doi: 10.1016/j.amjmed.2012.06.040[published Online First: Epub Date]].  
13  
14
- 15 10. Schlesinger I, Erikh I, Avizohar O, et al. Cardiovascular risk factors in restless legs  
16  
17 syndrome. *Movement disorders : official journal of the Movement Disorder Society*  
18  
19 2009;**24**(11):1587-92 doi: 10.1002/mds.22486[published Online First: Epub Date]].  
20  
21
- 22 11. Winter AC, Berger K, Glynn RJ, et al. Vascular risk factors, cardiovascular disease, and  
23  
24 restless legs syndrome in men. *The American journal of medicine* 2013;**126**(3):228-35,  
25  
26 35 e1-2 doi: 10.1016/j.amjmed.2012.06.039[published Online First: Epub Date]].  
27  
28
- 29 12. Kim J, Choi C, Shin K, et al. Prevalence of restless legs syndrome and associated factors in  
30  
31 the Korean adult population: the Korean Health and Genome Study. *Psychiatry and*  
32  
33 *clinical neurosciences* 2005;**59**(3):350-3 doi: 10.1111/j.1440-  
34  
35 1819.2005.01381.x[published Online First: Epub Date]].  
36  
37
- 38 13. Gao X, Schwarzschild MA, Wang H, et al. Obesity and restless legs syndrome in men and  
39  
40 women. *Neurology* 2009;**72**(14):1255-61 doi:  
41  
42 10.1212/01.wnl.0000345673.35676.1c[published Online First: Epub Date]].  
43  
44
- 45 14. Batool-Anwar S, Malhotra A, Forman J, et al. Restless legs syndrome and hypertension in  
46  
47 middle-aged women. *Hypertension* 2011;**58**(5):791-6 doi:  
48  
49 10.1161/HYPERTENSIONAHA.111.174037[published Online First: Epub Date]].  
50  
51
- 52 15. Ulfberg J, Nystrom B, Carter N, et al. Prevalence of restless legs syndrome among men aged  
53  
54 18 to 64 years: an association with somatic disease and neuropsychiatric symptoms.  
55  
56  
57  
58  
59  
60

- 1  
2  
3 Movement disorders : official journal of the Movement Disorder Society  
4  
5 2001;**16**(6):1159-63  
6  
7
- 8 16. Allen R, Chen C, Soaita A, et al. A randomized, double-blind, 6-week, dose-ranging study of  
9  
10 pregabalin in patients with restless legs syndrome. *Sleep medicine* 2010;**11**(6):512-9 doi:  
11  
12 10.1016/j.sleep.2010.03.003[published Online First: Epub Date]].  
13  
14
- 15 17. Juuti AK, Laara E, Rajala U, et al. Prevalence and associated factors of restless legs in a 57-  
16  
17 year-old urban population in northern Finland. *Acta neurologica Scandinavica*  
18  
19 2010;**122**(1):63-9 doi: 10.1111/j.1600-0404.2009.01262.x[published Online First: Epub  
20  
21 Date]].  
22  
23
- 24 18. Westrom J, Nilsson S, Sundstrom-Poromaa I, et al. Restless legs syndrome among women:  
25  
26 prevalence, co-morbidity and possible relationship to menopause. *Climacteric : the*  
27  
28 *journal of the International Menopause Society* 2008;**11**(5):422-8 doi:  
29  
30 10.1080/13697130802359683[published Online First: Epub Date]].  
31  
32  
33
- 34 19. Winkelman JW, Finn L, Young T. Prevalence and correlates of restless legs syndrome  
35  
36 symptoms in the Wisconsin Sleep Cohort. *Sleep medicine* 2006;**7**(7):545-52 doi:  
37  
38 10.1016/j.sleep.2006.01.004[published Online First: Epub Date]].  
39  
40
- 41 20. Winkelman JW, Shahar E, Sharief I, et al. Association of restless legs syndrome and  
42  
43 cardiovascular disease in the Sleep Heart Health Study. *Neurology* 2008;**70**(1):35-42 doi:  
44  
45 10.1212/01.wnl.0000287072.93277.c9[published Online First: Epub Date]].  
46  
47
- 48 21. Winter AC, Schurks M, Glynn RJ, et al. Restless legs syndrome and risk of incident  
49  
50 cardiovascular disease in women and men: prospective cohort study. *BMJ open*  
51  
52 2012;**2**(2):e000866 doi: 10.1136/bmjopen-2012-000866[published Online First: Epub  
53  
54 Date]].  
55  
56  
57  
58  
59  
60

- 1  
2  
3  
4  
5  
6  
7  
8  
9  
10  
11  
12  
13  
14  
15  
16  
17  
18  
19  
20  
21  
22  
23  
24  
25  
26  
27  
28  
29  
30  
31  
32  
33  
34  
35  
36  
37  
38  
39  
40  
41  
42  
43  
44  
45  
46  
47  
48  
49  
50  
51  
52  
53  
54  
55  
56  
57  
58  
59  
60
22. Li Y, Walters AS, Chiuve SE, et al. Prospective study of restless legs syndrome and coronary heart disease among women. *Circulation* 2012;**126**(14):1689-94
23. Li Y, Wang W, Winkelman JW, et al. Prospective study of restless legs syndrome and mortality among men. *Neurology* 2013;**81**(1):52-9
24. Walters AS, Moussouttas M, Siddiqui F, et al. Prevalence of stroke in Restless Legs Syndrome: Initial Results Point to the Need for More Sophisticated Studies. *The open neurology journal* 2010;**4**:73-7 doi: 10.2174/1874205X01004010073[published Online First: Epub Date]].
25. Schurks M, Winter AC, Berger K, et al. Migraine and restless legs syndrome in women. *Cephalalgia*; **32**(5):382-9
26. Winter AC, Schurks M, Berger K, et al. Migraine and restless legs syndrome in men. *Cephalalgia*; **33**(2):130-5
27. Group CS. Vascular factors and risk of dementia: design of the Three-City Study and baseline characteristics of the study population. *Neuroepidemiology* 2003;**22**(6):316-25
28. Maillard P, Delcroix N, Crivello F, et al. An automated procedure for the assessment of white matter hyperintensities by multispectral (T1, T2, PD) MRI and an evaluation of its between-centre reproducibility based on two large community databases. *Neuroradiology* 2008;**50**(1):31-42 doi: 10.1007/s00234-007-0312-3[published Online First: Epub Date]].
29. Soumare A, Elbaz A, Zhu Y, et al. White matter lesions volume and motor performances in the elderly. *Annals of neurology* 2009;**65**(6):706-15 doi: 10.1002/ana.21674[published Online First: Epub Date]].

- 1  
2  
3  
4  
5  
6  
7  
8  
9  
10  
11  
12  
13  
14  
15  
16  
17  
18  
19  
20  
21  
22  
23  
24  
25  
26  
27  
28  
29  
30  
31  
32  
33  
34  
35  
36  
37  
38  
39  
40  
41  
42  
43  
44  
45  
46  
47  
48  
49  
50  
51  
52  
53  
54  
55  
56  
57  
58  
59  
60
30. Zhu YC, Dufouil C, Soumare A, et al. High degree of dilated Virchow-Robin spaces on MRI is associated with increased risk of dementia. *Journal of Alzheimer's disease : JAD* 2010;**22**(2):663-72 doi: 10.3233/JAD-2010-100378[published Online First: Epub Date]].
31. Berger K, von Eckardstein A, Trenkwalder C, et al. Iron metabolism and the risk of restless legs syndrome in an elderly general population--the MEMO-Study. *Journal of neurology* 2002;**249**(9):1195-9 doi: 10.1007/s00415-002-0805-2[published Online First: Epub Date]].
32. Hogl B, Kiechl S, Willeit J, et al. Restless legs syndrome: a community-based study of prevalence, severity, and risk factors. *Neurology* 2005;**64**(11):1920-4 doi: 10.1212/01.WNL.0000163996.64461.A3[published Online First: Epub Date]].
33. Report of the Expert Committee on the Diagnosis and Classification of Diabetes Mellitus. *Diabetes care* 1997;**20**(7):1183-97
34. Nocturnal limb movements are correlated with cerebral white matter hyperintensities. *American Academy of Neurology*; 2012; New Orleans, LA, USA.
35. Henskens LH, Kroon AA, van Oostenbrugge RJ, et al. Associations of ambulatory blood pressure levels with white matter hyperintensity volumes in hypertensive patients. *Journal of hypertension* 2009;**27**(7):1446-52 doi: 10.1097/HJH.0b013e32832b5204[published Online First: Epub Date]].
36. Elwood P, Hack M, Pickering J, et al. Sleep disturbance, stroke, and heart disease events: evidence from the Caerphilly cohort. *Journal of epidemiology and community health* 2006;**60**(1):69-73 doi: 10.1136/jech.2005.039057[published Online First: Epub Date]].
37. van Straaten EC, Fazekas F, Rostrup E, et al. Impact of white matter hyperintensities scoring method on correlations with clinical data: the LADIS study. *Stroke; a journal of cerebral*



1  
2  
3 circulation 2006;**37**(3):836-40 doi: 10.1161/01.STR.0000202585.26325.74[published  
4  
5  
6 Online First: Epub Date]].  
7  
8  
9  
10  
11  
12  
13  
14  
15  
16  
17  
18  
19  
20  
21  
22  
23  
24  
25  
26  
27  
28  
29  
30  
31  
32  
33  
34  
35  
36  
37  
38  
39  
40  
41  
42  
43  
44  
45  
46  
47  
48  
49  
50  
51  
52  
53  
54  
55  
56  
57  
58  
59  
60

For peer review only

Table 1. Characteristics of participants by RLS status.

| Characteristic (%)                 | No RLS<br>(n=817) | RLS<br>(n=218)   |
|------------------------------------|-------------------|------------------|
| Age (mean, SD)                     | 71.6 (3.9)        | 71.6 (3.8)       |
| Sex (% female)                     | 59.7              | 72.9             |
| Smoking status (%)                 |                   |                  |
| Never                              | 61.333.5          | 67.0             |
| Past                               | 5.1               | 26.66.4          |
| Current                            |                   |                  |
| Alcohol consumption (%)            | 18.144.619.215.3  | 22.021.419.311.5 |
| Non-drinker                        |                   |                  |
| 0 to ≤12 g/day                     |                   |                  |
| 12 to ≤24 g/day                    |                   |                  |
| >24 g/day                          |                   |                  |
| Physically active (%)              | 55.9              | 63.8             |
| Body mass index                    | 51.438.89.8       | 56.032.611.5     |
| <25 kg/m <sup>2</sup>              |                   |                  |
| 25 to < 30 kg/m <sup>2</sup>       |                   |                  |
| ≥30 kg/m <sup>2</sup>              |                   |                  |
| History of high blood pressure (%) | 73.3              | 71.6             |
| History of high cholesterol (%)    | 58.0              | 51.4             |
| History of diabetes (%)            | 13.0              | 9.2              |

|                                                                                               |                  |                  |
|-----------------------------------------------------------------------------------------------|------------------|------------------|
| History of cardiovascular disease (%)                                                         | 11.3             | 7.8              |
| History of stroke (%)                                                                         | 4.5              | 1.4              |
| History of peripheral artery disease (%)                                                      | 2.1              | 2.8              |
| History of leg operation (%)                                                                  | 0.6              | 0.5              |
| History of edema/swelling of legs and ankles (%)                                              | 19.1             | 25.2             |
| Difficulty sleeping                                                                           | 19.652.613.112.5 | 14.246.819.316.5 |
| Never                                                                                         |                  |                  |
| Rarely                                                                                        |                  |                  |
| Regularly                                                                                     |                  |                  |
| Often                                                                                         |                  |                  |
| Quality of sleep                                                                              | 46.930.49.4      | 31.238.513.8     |
| Good                                                                                          |                  |                  |
| Average                                                                                       |                  |                  |
| Mediocre or bad                                                                               |                  |                  |
| Take medications for sleep                                                                    | 31.2             | 36.7             |
| Volume of white matter hyperintensities<br>(cm <sup>3</sup> , median and interquartile range) | 3.9 (2.7 – 5.8)  | 4.0 (2.7 – 6.0)  |

\*Numbers may not add to 100% due to missing data.

List of abbreviations: RLS=restless legs syndrome, SD=standard deviation

Table 2. Cross-sectional age- and sex-adjusted and multivariable-adjusted\* associations between RLS and brain white matter lesion volumes.

| Total WML volume in tertiles           | No restless legs syndrome (n=817) |           | Restless legs syndrome (n=218)           |                                             |
|----------------------------------------|-----------------------------------|-----------|------------------------------------------|---------------------------------------------|
|                                        | N (%)                             | N (%)     | Age and sex-adjusted odds ratio (95% CI) | Multivariable-adjusted* odds ratio (95% CI) |
| Lowest Tertile                         |                                   |           | 1.00                                     | 1.00                                        |
|                                        | 269 (32.9)                        | 73 (33.5) |                                          |                                             |
| Middle Tertile                         |                                   |           | 1.04<br>(0.72, 1.52)                     | 1.09<br>(0.75, 1.60)                        |
|                                        | 271 (33.2)                        | 71 (32.6) |                                          |                                             |
| Highest Tertile                        |                                   |           | 1.09<br>(0.74, 1.59)                     | 1.17<br>(0.79, 1.74)                        |
|                                        | 277 (33.9)                        | 74 (33.9) |                                          |                                             |
| Periventricular WML volume in tertiles |                                   |           |                                          |                                             |
| Lowest Tertile                         |                                   |           | 1.00                                     | 1.00                                        |
|                                        | 267 (32.7)                        | 74 (33.9) |                                          |                                             |

|                    |            |           |              |              |
|--------------------|------------|-----------|--------------|--------------|
| Middle Tertile     |            |           | 0.86         | 0.85         |
|                    | 273 (33.4) | 69 (31.7) | (0.49, 1.51) | (0.48, 1.50) |
| Highest Tertile    |            |           | 0.96         | 0.91         |
|                    | 277 (33.9) | 75 (34.4) | (0.44, 2.10) | (0.41, 2.01) |
| Deep WML volume in |            |           |              |              |
| tertiles           |            |           |              |              |
| Lowest Tertile     |            |           | 1.00         | 1.00         |
|                    | 275 (33.7) | 66 (30.3) |              |              |
| Middle Tertile     |            |           | 1.27         | 1.24         |
|                    | 266 (32.6) | 77 (35.3) | (0.85, 1.90) | (0.82, 1.87) |
| Highest Tertile    |            |           | 1.27         | 1.33         |
|                    | 276 (33.8) | 75 (34.4) | (0.78, 2.05) | (0.81, 2.17) |

\*Adjusted for age, sex, smoking status, alcohol consumption, physical activity, body mass index, history of hypertension, history of diabetes, history of cardiovascular disease, history of peripheral artery disease, history of leg operation, and history of edema/swelling of legs and ankles.

1  
2  
3 **Structural Brain Lesions and Restless Legs Syndrome: A cross-sectional population-based**  
4  
5  
6 **study**  
7

8 Pamela M. Rist, ScD, Christophe Tzourio, MD, PhD, Alexis Elbaz, MD, PhD, Aïcha Soumaré,  
9  
10 PhD, Carole Dufouil, PhD, Bernard Mazoyer, MD, PhD, Tobias Kurth, MD, ScD  
11  
12  
13  
14  
15

16 From the Division of Preventive Medicine (P.M.R., T.K.), Department of Medicine, Brigham  
17 and Women's Hospital, Harvard Medical School, Boston, MA; the Department of Social and  
18 Behavioral Sciences (P.M.R.) and the Department of Epidemiology (P.M.R., T.K.), Harvard  
19 School of Public Health, Boston, MA; INSERM Research Center for Epidemiology and  
20 Biostatistics (U897)– Team Neuroepidemiology (C.T., A.S., C.D., T.K.), Bordeaux, France,  
21 INSERM, Centre for Research in Epidemiology and Population Health, U1018, Social and  
22 occupational determinants of health, F-94807 (A.E.), Villejuif, France; Université de Versailles  
23 St-Quentin, UMRS 1018, F-78035 (A.E.), Versailles, France; CNRS CEA (UMR5296)  
24 Neurofunctional Imaging Group, College of Health Sciences, University of Bordeaux (B.M.),  
25 Bordeaux, France; and College of Health Sciences, University of Bordeaux (T.K., C.T., C.D.),  
26  
27  
28  
29  
30  
31  
32  
33  
34  
35  
36  
37  
38  
39  
40  
41  
42  
43  
44  
45  
46  
47  
48  
49  
50  
51  
52  
53  
54  
55  
56  
57  
58  
59  
60

Corresponding Author:

Tobias Kurth, MD, ScD

Inserm Research Center for Epidemiology and Biostatistics (U897) - Team Neuroepidemiology

University of Bordeaux

146 rue Léo Saignat - CS61292, 33076

Bordeaux, France

1  
2  
3 p: [+33 5 47 30 42 56](tel:+33547304256)

4  
5  
6 e: [tobias.kurth@u-bordeaux.fr](mailto:tobias.kurth@u-bordeaux.fr)

7  
8  
9  
10 Alternate Corresponding Author:

11  
12  
13 Pamela M. Rist

14  
15  
16 900 Commonwealth Avenue, 3rd floor

17  
18  
19 Boston, MA 02215

20  
21  
22 Tel: (617) 278-0878

23  
24  
25 Fax: (617) 731-3843

26  
27  
28 E-mail: [prist@mail.harvard.edu](mailto:prist@mail.harvard.edu)

29  
30  
31  
32  
33  
34  
35 **Study Funding:**

36  
37 The 3C study is conducted under a partnership agreement between the Institut National de la  
38 Santé et de la Recherche Médicale (INSERM), the Victor Segalen–Bordeaux II University, and  
39 the Sanofi-Synthélabo Company. The Fondation pour la Recherche Médicale funded the  
40 preparation and initiation of the study. The 3C Study is also supported by the Caisse Nationale  
41 Maladie des Travailleurs Salariés, Direction Générale de la Santé, Haute Autorité de la Santé,  
42 Institut National de Prévention et d'Education pour la Santé, Conseils Régionaux of Bourgogne,  
43 Fondation de France, Ministry of Research-INSERM Program “Cohortes et collections de  
44 données biologiques,” Mutuelle Générale de l'Education Nationale, Institut de  
45  
46  
47  
48  
49  
50  
51  
52  
53  
54  
55  
56  
57  
58  
59  
60

1  
2  
3 la Longévité, Conseil Général de la Côte d'or. Pamela M. Rist was supported by the Rose  
4  
5  
6 Traveling Fellowship Program in Chronic Disease Epidemiology and Biostatistics from the  
7  
8 Harvard School of Public Health.  
9

### 10 11 12 **Full Author Disclosures:**

13  
14  
15 Pamela M. Rist has received within the last 2 years funding from a training grant from the  
16  
17 National Institute of Aging and from the Rose Traveling Fellowship Program in Chronic Disease  
18  
19 Epidemiology and Biostatistics from the Harvard School of Public Health.  
20

21  
22 Christophe Tzourio has received fees from the Fondation Plan Alzheimer, the Fondation de  
23  
24 Recherche sur l'Hypertension Artérielle, and ABBOTT for participating in scientific committees.  
25  
26 He has also received investigator-initiated research funding from the French National Research  
27  
28 Agency (ANR) and the Fondation Plan Alzheimer for the 3C study.  
29

30  
31 Tobias Kurth has received within the last 2 years investigator-initiated research funding from the  
32  
33 French National Research Agency, and the US National Institutes of Health. Further, he has  
34  
35 received honoraria from the American Academy of Neurology for educational lectures and from  
36  
37 the *BMJ* and *Cephalalgia* for editorial services.  
38

39  
40 Alexis Elbaz has received within the last 2 years investigator-initiated research funding unrelated  
41  
42 to this project from the French National Research Agency, EU Joint Programme –  
43  
44 Neurodegenerative Disease Research (JPND), the French Agency for Drug Security (ANSM),  
45  
46 and the French Institute for Research in Public Health (IRESP).  
47

48  
49 Aicha Soumare has no disclosures.  
50

51  
52 Carole Dufouil has received honoraria from the American Academy of Neurology for  
53  
54 educational lectures and from Eisai, Inc. for providing methodological expertise.  
55  
56  
57  
58  
59  
60



1  
2  
3 Bernard Mazoyer has no disclosures.  
4  
5  
6  
7

8 **Key words:** Epidemiology, Restless Legs Syndrome, MRI  
9

10 **Running head:** Structural Brain Lesions and Restless Legs Syndrome  
11  
12  
13  
14  
15  
16  
17  
18  
19  
20  
21  
22  
23  
24  
25  
26  
27  
28  
29  
30  
31  
32  
33  
34  
35  
36  
37  
38  
39  
40  
41  
42  
43  
44  
45  
46  
47  
48  
49  
50  
51  
52  
53  
54  
55  
56  
57  
58  
59  
60

For peer review only

## Abstract

**Objective:** To evaluate the association between white matter lesion volume, silent infarcts, and restless legs syndrome in a population-based study of elderly individuals.

**Design:** Cross-sectional study

**Setting:** Population-based Three-City study

**Participants:** ~~1268~~-~~1035~~ individuals from the Dijon, France center of the Three-City study who had available information on volume of white matter lesions (WML) from MRI scans and who answered questions about the prevalence of restless legs syndrome

**Primary Outcome Measure:** Prevalence of restless legs syndrome

**Results:** White matter lesion volume was measured using an automated tissue segmentation method. Logistic regression was used to evaluate adjusted associations between tertiles of WML volume and restless legs syndrome and between silent infarcts and restless legs syndrome. 218 individuals (~~17.2~~~~21.1~~%) were determined to have restless legs syndrome. Compared to those in the first tertile of WML volume, individuals in the second tertile (OR=~~0.95~~~~1.09~~; 95% CI: 0.~~75~~~~66~~, 1.~~60~~~~37~~) or third tertile (OR=1.~~17~~~~00~~; 95% CI: 0.~~79~~~~69~~, 1.~~74~~~~46~~) did not have an increased prevalence of restless legs syndrome. We also did not observe associations between the volume of deep or periventricular WML and restless legs syndrome; nor did we observe an association between silent brain infarcts and RLS (OR=0.~~61~~~~74~~; 95% CI: 0.~~33~~~~40~~, 1.~~39~~~~11~~). These findings were not modified by age or gender.

**Conclusion:** Higher volume of WML and the presence of silent infarcts were not associated with an increased prevalence of restless legs syndrome in this population-based cohort of elderly individuals.

## Article Summary

### Article focus

- The aim of this study is to evaluate the association between white matter lesion volume, silent infarcts, and restless legs syndrome (RLS) in a population-based study of elderly individuals.

### Key messages

- We found no cross-sectional association between WML volume or brain infarcts and RLS. The results of this study do not support an association between RLS and vascular brain lesions.

### Strengths and limitations of this study

- Strengths include the population-based setting with available brain imaging, the size of the cohort, standardized assessment of RLS using criteria from the International Restless Legs Study Group and use of an automated measurement procedure to quantify and localize WML.
- Limitations to this study include its cross-sectional design, lack of information on kidney disease or iron deficiency for participants, and self-reported information on RLS. Additionally, RLS status was not assessed at baseline and participants who were still in the study at restless legs assessment may be healthier than participants who died or dropped out prior to RLS assessment.

## Introduction

Restless legs syndrome (RLS) is a neurological disorder that originates in the motoneurons of the brain and is characterized by an urge to move the legs and unpleasant leg sensations. Population based studies using the minimal diagnostic criteria from the International Restless Legs Syndrome Study Group[1 2] have found the prevalence of RLS ranges from 6% to 12% with women being affected twice as often as men.[3] In addition, the prevalence of RLS increases with age.[3] While the causes of RLS are unknown, some studies have suggested that dysfunction of the dopaminergic system may contribute to disease development. However, neuroimaging studies have not shown any primary neurodegeneration of dopaminergic neurons in the substantia nigra.[4] A large genetics consortium study has found some genetic variants that may be associated with the development of RLS.[5]

Several studies have found associations between cardiovascular risk factors including smoking[6-10], diabetes[7 9 11], hypercholesterolemia[9 10], exercise[9], body mass index[6 9 12 13] and hypertension[7 14 15] and RLS. These associations have led to the hypothesis that RLS may be a risk factor for cardiovascular disease. However, evidence for an association between RLS and incident cardiovascular disease is mixed.[6 9 11 15-20] One recent longitudinal study did not find evidence of an association between RLS and incident cardiovascular disease[21] while another found an association between RLS and coronary heart disease[22] and mortality.[23] Several possible biological mechanisms have been proposed to explain why RLS may be associated with high blood pressure, heart disease, and stroke. RLS is associated with sympathetic hyperactivity which may lead to daytime hypertension which itself is a risk factor for heart disease and stroke. Alternatively, even if the sympathetic hyperactivity does not lead to daytime hypertension, it may impact atherosclerotic plaque formation and rupture which could

1  
2  
3 lead to heart disease and stroke. Other comorbidities associated with RLS may also be risk  
4  
5 factors for heart disease and stroke.[24] In addition to its association with cardiovascular risk  
6  
7 factors, RLS is also associated with migraine in both men and women.[25 26]  
8  
9

10  
11 Given the association of RLS with several vascular risk factors as well as with migraine,  
12  
13 we were interested to know if white matter lesions (WML), which are also strongly related to  
14  
15 vascular risk factors, including migraine, and cardiovascular disease, were associated with RLS.  
16  
17 Using a population-based cohort of elderly individuals residing in France, we examined the  
18  
19 cross-sectional association between white matter lesion volume and RLS prevalence.  
20  
21  
22  
23

## 24 **Methods**

25  
26  
27 The Three-City (3C) is a longitudinal cohort study enrolling subjects living in three  
28  
29 French cities (Bordeaux, Dijon, and Montpellier) designed to estimate the risk of dementia and  
30  
31 cognitive impairment attributable to vascular risk factors.[27] The present analysis only uses data  
32  
33 from subjects living in Dijon because data on RLS were only collected in that city. Each subject  
34  
35 signed an informed consent statement and the Ethical Committee of the University Hospital of  
36  
37 Kremlin-Bicêtre approved the methods and procedures of the 3C study.  
38  
39  
40  
41

42 To be eligible for the 3C study, the participant needs to live in Dijon, be registered on the  
43  
44 electoral rolls in 1999, be 65 years of older, and not be institutionalized. A total of 4,931  
45  
46 individuals were recruited at the Dijon site between 1999 and 2001. For the MRI sub-study, all  
47  
48 subjects recruited from the Dijon center who were <80 years of age and enrolled between June  
49  
50 1999 and September 2000 were eligible to participate. Of those eligible, 2,285 (82%) subjects  
51  
52 agreed to participate in the MRI study, but only 1,924 scans could be performed at baseline due  
53  
54 to financial constraints.  
55  
56  
57  
58  
59  
60

1  
2  
3 The process of obtaining the MRI information has been described in detail elsewhere.[28  
4  
5 29] In brief, MRI scans were obtained using a 1.5T Magnetom (Siemens, Erlangen, Germany). A  
6  
7 3-dimensional (3D) high-resolution T1-weighted brain volume was obtained using a 3D  
8  
9 inversion recovery fast spoiled-gradient echo sequence. T2- and proton density (PD)-weighted  
10  
11 brain volumes were acquired using a 2-dimensional dual spin echo sequences with two echo  
12  
13 times. Each subject dataset (T1, T2, PD) was reconstructed and visually checked for major  
14  
15 artifacts before being stored.  
16  
17  
18  
19

20  
21 A fully-automated image processing software was used to detect, measure, and localize  
22  
23 WMLs. The process has been described in detail previously[28 29]. Based on the morphologic  
24  
25 parameters (center of mass coordinates, Euclidian distance to the ventricular system, principal  
26  
27 axes dimension), each WML was labeled as being either periventricular if the distance to the  
28  
29 ventricular system was <10 mm or deep otherwise. Total volume of periventricular and deep  
30  
31 WMLs were estimated by summing the volumes of all periventricular and deep lesions.  
32  
33  
34  
35

36 We log transformed the values of total WML, periventricular WML, deep WML, and  
37  
38 total white matter volume as they were not normally distributed. We then divided the log  
39  
40 transformed values into tertiles to allow for non-linear associations between WML volumes and  
41  
42 RLS.  
43  
44  
45

46 Infarcts were rated on T1, T2, and PD-weighted images and defined as focal lesions  $\geq 3$   
47  
48 mm in diameter with the same signal characteristic as cerebrospinal fluid on all sequences. They  
49  
50 were discriminated from dilated Virchow-Robin spaces using multi-planar reformatting. Those  
51  
52 with a typical vascular shape and following the orientation of perforating vessels were classified  
53  
54 as dilated Virchow-Robin spaces and not as infarcts.[30]  
55  
56  
57  
58  
59  
60

### *Restless Legs Syndrome Assessment*

RLS was assessed at the fifth and sixth follow-up waves of the study. Participants were asked a series of questions designed to address the four minimal diagnostic criteria of the International Restless Legs Study Group which has been established and validated in previous studies.[31 32] The participants were asked: “Have you ever felt unpleasant sensation in the legs (restlessness, tingling, tension, annoyance, annoyances, contractions, twitching, numbness, electricity, etc.) with the irresistible need or want to move?” Response options were yes or no. If the participant responded “yes”, he or she was further asked: “Do these unpleasant sensations occur solely or mainly at rest (when you are sitting or lying down, without moving your legs) and do they improve with movement?” and “Are these unpleasant sensations more intense in the evening or at night than in the morning?” Response options for these questions were yes or no. If the participant responded yes to all three questions, he or she was defined as having RLS.

### *Covariates*

Trained psychologists collected sociodemographic and medical data on participants during home visits. Participants were asked if they were treated for various co-morbidities at baseline and in the fifth and sixth wave of the study. We used all available information from baseline to RLS assessment to determine a subject’s co-morbidity history. History of cardiovascular disease was defined as a history of myocardial infarction, stroke, angina, percutaneous transluminal coronary angioplasty, or coronary artery bypass surgery. History of diabetes was defined as glycemia  $\geq 7$  mmol/L or use of anti-diabetic treatment.[33] High blood pressure was defined as measured systolic blood pressure  $\geq 140$  mmHg or measured diastolic blood pressure  $\geq 90$  mmHg. High cholesterol was defined as lipid lowering treatment or

1  
2  
3 cholesterol  $\geq 6.2$  mmol/L. Information was also collected on history of peripheral artery disease,  
4  
5 history of leg operation, and history of edema/swelling of legs and ankles.  
6  
7

8 For the following covariates, we used values from the follow-up waves during which  
9  
10 RLS was assessed: body mass index, smoking status, alcohol consumption and physical activity.  
11  
12 If this value was missing, we used values from baseline. Height and weight were used to  
13  
14 calculate body mass index. Smoking status was reported as never, past, or current, and alcohol  
15  
16 consumption was measured in grams per day. Due to changes in the questionnaires on physical  
17  
18 activity over time, we classified participants as active versus non-active.  
19  
20  
21  
22

### 23 *Statistical Analysis*

24  
25  
26 Of the 1924 individuals in the MRI sub-study, 1189 were still alive and participating in  
27  
28 the 3C study during the waves in which RLS was assessed. ~~w~~We excluded 581-97 participants  
29  
30 who did not answer any of the questions about RLS and the 5775 participants who did not have  
31  
32 data on total WML volume, leaving a total of 1268-1035 participants eligible for our analyses of  
33  
34 which 218 (17.221.1%) reported RLS (Figure 1).  
35  
36  
37  
38

39 We performed a cross-sectional analysis using logistic regression to calculate odds ratios  
40  
41 and 95% confidence intervals of reporting RLS for each tertile of the WML volumes using the  
42  
43 lowest tertile as the reference group. Analyses examining the association between tertiles of total  
44  
45 WML volume and RLS adjusted for tertiles of total white matter as the likelihood of WML  
46  
47 correlates with the size of the total white matter. Analyses examining the association between  
48  
49 tertiles of periventricular or deep WML and RLS adjusted for tertiles of WML. We also used  
50  
51 logistic regression to examine the association between any brain silent infarct and RLS. For the  
52  
53 infarct analyses, we excluded participants with a brain tumor detected at MRI.  
54  
55  
56  
57  
58  
59  
60



1  
2  
3 We performed age- and sex-adjusted analyses and multivariable-adjusted analyses. Our  
4 multivariable analyses adjusted for age (continuous), sex, smoking status (never, past, or current  
5 smoker), alcohol consumption (0, 0 to  $\leq 12$ , 12 to  $\leq 24$ , and  $> 24$  grams/day), physical activity  
6 (active versus not active), body mass index ( $< 25$  kg/m<sup>2</sup>, 25 to  $< 30$  kg/m<sup>2</sup>, and  $\geq 30$  kg/m<sup>2</sup>), history  
7 of hypertension (yes/no), history of diabetes (yes/no), history of cardiovascular disease (yes/no),  
8 history of peripheral artery disease (yes/no), history of leg operation (yes/no), and history of  
9 edema/swelling of legs and ankles (yes/no). Further adjustment for measures of sleep quality,  
10 difficulty sleeping and taking sleep medications did not affect our results (results not shown).  
11  
12 All covariates were measured at baseline. Less than 4439 people were missing information on  
13 any covariate, except for difficulty sleeping and were assigned to the most frequent reference  
14 value of that covariate. We created a separate category for those missing information on  
15 difficulty sleeping. We also performed separate age-adjusted analyses stratified by sex or mean  
16 age (72 years).  
17  
18  
19  
20  
21  
22  
23  
24  
25  
26  
27  
28  
29  
30  
31  
32  
33  
34

35 We considered a two-tailed p value of  $< 0.05$  as statistically significant and used SAS  
36  
37 9.4.3 as statistical software (Cary, NC).  
38  
39

## 40 Results

41  
42  
43 The characteristics of the participants by RLS status can be seen in Table 1. Those who  
44 reported RLS were more likely to be female, never smokers, non-drinkers, and were less  
45 physically active than those who did not report RLS.  
46  
47  
48  
49

50  
51 We did not observe an association between tertiles of WML and RLS (Table 2).  
52 Compared to those in the lowest tertile of WML, the multivariable-adjusted odds ratio of  
53 reporting RLS was 0.951.09 (95% CI: 0.7566, 1.6037) for those in the second tertile and 1.1700  
54  
55  
56  
57  
58  
59  
60

(95% CI: 0.7969, 1.7446) for those in the top tertile. We also did not observe an association between tertiles of deep or periventricular WML and RLS (Table 2).

We also performed age-adjusted analyses stratified by sex or mean age (72 years).

Among men, compared to those in the lowest tertile of WML, the age-adjusted odds ratio of reporting RLS was 0.743 (95% CI: 0.356, 1.562) for those in the second tertile and 0.8578 (95% CI: 0.4138, 1.7756) for those in the top tertile. Among women, compared to those in the lowest tertile of WML, the age-adjusted odds ratio of reporting RLS was 1.1702 (95% CI: 0.7667, 1.8155) for those in the second tertile and 1.1307 (95% CI: 0.7269, 1.7866) for those in the top tertile. For those under 72 years of age, the age-adjusted odds ratio of reporting RLS was 0.880.99 (95% CI: 0.6155, 1.6242) for those in the second tertile and 1.030.99 (95% CI: 0.6159, 1.7566) for those in the top tertile compared to those in the lowest tertile of WML. For those 72 years of age or older, the age-adjusted odds ratio of reporting RLS was 1.1002 (95% CI: 0.6158, 1.9880) for those in the second tertile and 1.2005 (95% CI: 0.681, 2.101.78) for those in the top tertile compared to those in the lowest tertile of WML.

We also explored whether there was an association between infarcts and RLS. Of the 1330 people with information on brain infarcts, 131 had a brain infarct and 225 reported RLS. The age- and sex-adjusted odds ratio between infarcts and RLS was 0.4259 (95% CI: 0.1532, 1.2107). The multivariable-adjusted odds ratios between infarcts and RLS was 0.7464 (95% CI: 0.4033, 1.3911).

## Discussion

1  
2  
3 In this large, population-based study of elderly individuals, we found no cross-sectional  
4 association between WML volume or brain infarcts and RLS. The results of this study do not  
5 support an association between RLS and vascular brain lesions.  
6  
7  
8  
9

10  
11 Previous research on the association between WML volume and RLS is limited. A small  
12 study of 45 patients found that white matter hyperintensities were correlated with total limb  
13 movements per hour of sleep after adjusting for hypertension ( $r=0.66$ ,  $p=0.01$ ).<sup>[34]</sup> The authors  
14 suggest that leg movements may be associated with poor quality sleep which may contribute to  
15 episodes of nocturnal hypertension. Although nocturnal hypertension has been associated with  
16 the development of white matter hyperintensities even among those with daytime  
17 hypertension<sup>[35]</sup>, this study did not present results on the association between RLS and white  
18 matter hyperintensities. Additionally, it is unclear if the authors adjusted for other potential  
19 confounders including age and sex.  
20  
21  
22  
23  
24  
25  
26  
27  
28  
29  
30  
31  
32

33 Another study using data from the Memory and Morbidity in Augsburg Elderly Study  
34 (MEMO) examined the association between RLS and brain lesions detected using MRI. They  
35 found a non-significant increase risk of silent infarction (OR=2.11, 95% CI: 0.71-6.27) and  
36 subcortical brain lesions greater than or equal to 10mm (OR=1.35, 95% CI: 0.56-3.22) in those  
37 who reported RLS compared to those without RLS.<sup>[24]</sup> The small size of this study (26 RLS  
38 cases and 241 controls) and limited power to control for confounding by cardiovascular risk  
39 factors may explain some of the differences between the results of the MEMO study and our  
40 study.  
41  
42  
43  
44  
45  
46  
47  
48  
49  
50  
51  
52

53 While evidence for a direct association between WML and RLS is limited, some cross-  
54 sectional studies have suggested that RLS may be associated with hypertension<sup>[14]</sup>, stroke<sup>[9 36]</sup>,  
55  
56  
57  
58  
59  
60

1  
2  
3 and migraine[25 26], which are associated with WML. However, a recent longitudinal study  
4  
5 found no association between RLS and incident cardiovascular disease [21] and not all cross-  
6  
7 sectional studies have found associations between hypertension and RLS.[9 11] Our study did  
8  
9 not find an association between RLS and structural brain lesions which are strongly related to  
10  
11 vascular risk factors and cardiovascular disease. This observation aligns with the previous study  
12  
13 that did not find an association between RLS and incident cardiovascular disease.  
14  
15

16  
17  
18 This study has several strengths including the population-based setting with available  
19  
20 brain imaging, the size of the cohort, and standardized assessment of RLS using criteria from the  
21  
22 International Restless Legs Study Group.[1 2] We also used an automated measurement  
23  
24 procedure to quantify and localize WML. Compared to visual scale, automated procedures are  
25  
26 not subject to a ceiling effect, permit better discrimination of lesion volume, and are more  
27  
28 sensitive in detecting small group differences.[37]  
29  
30  
31

32  
33 Limitations to this study include its cross-sectional design which prevents us from  
34  
35 determining the temporal ordering of RLS and WML or examining how RLS may impact WML  
36  
37 progression over time. RLS was first assessed in the fifth and sixth waves of the study  
38  
39 (approximately 10 years after baseline). Participants who were still in the study then may be  
40  
41 healthier than participants who died or dropped out prior to RLS assessment. We did not have  
42  
43 information on kidney disease or iron deficiency for participants, which may be related to RLS.  
44  
45 Information on RLS was self-reported and potential misclassification is possible. However, we  
46  
47 used the best available questionnaire for population-level assessment of RLS and this  
48  
49 questionnaire has been validated in previous cohorts.[31 32] Additionally, our questionnaire did  
50  
51 not assess RLS severity or periodic limb movements association with RLS so we are unable to  
52  
53  
54  
55  
56  
57  
58  
59  
60

determine if the severity of RLS or presence of periodic limb movements may modify the association between RLS and WMH.

While our data do not support a strong association between structural brain lesions and RLS, further targeted research is warranted to evaluate whether subgroups of patients with RLS exist who are at increased risk for structural brain lesions.

### **Authorship Contributions**

Pamela M. Rist: drafting/revising the manuscript for content, including medical writing for content; study concept or design; and analysis or interpretation of data

Christophe Tzourio: obtaining funding, interpretation of data, revising the manuscript for content, and supervision

Alexis Elbaz: interpretation of data and revising the manuscript for content

Aicha Soumare: interpretation of data and revising the manuscript for content

Carole Dufouil: interpretation of data and revising the manuscript for content

Bernard Mazoyer: interpretation of data and revising the manuscript for content

Tobias Kurth: Conception and design, interpretation of data, revising the manuscript for content, and supervision

All authors have approved the final version of the manuscript and agree to be accountable for all aspects of the work in ensuring that questions related to the accuracy or integrity of any part of the work are appropriately investigated and resolved.

## References

1. Allen RP, Picchiatti D, Hening WA, et al. Restless legs syndrome: diagnostic criteria, special considerations, and epidemiology. A report from the restless legs syndrome diagnosis and epidemiology workshop at the National Institutes of Health. *Sleep medicine* 2003;**4**(2):101-19
2. Walters AS. Toward a better definition of the restless legs syndrome. The International Restless Legs Syndrome Study Group. *Movement disorders : official journal of the Movement Disorder Society* 1995;**10**(5):634-42 doi: 10.1002/mds.870100517[published Online First: Epub Date].
3. Berger K, Kurth T. RLS epidemiology--frequencies, risk factors and methods in population studies. *Movement disorders : official journal of the Movement Disorder Society* 2007;**22** **Suppl 18**:S420-3 doi: 10.1002/mds.21589[published Online First: Epub Date].
4. Paulus W, Dowling P, Rijsman R, Stiasny-Kolster K, Trenkwalder C, de Weerd A. Pathophysiological concepts of restless legs syndrome. *Movement disorders : official journal of the Movement Disorder Society* 2007;**22**(10):1451-6 doi: 10.1002/mds.21533[published Online First: Epub Date].
5. Winkelmann J, Schormair B, Lichtner P, et al. Genome-wide association study of restless legs syndrome identifies common variants in three genomic regions. *Nature genetics* 2007;**39**(8):1000-6 doi: 10.1038/ng2099[published Online First: Epub Date].
6. Ohayon MM, Roth T. Prevalence of restless legs syndrome and periodic limb movement disorder in the general population. *Journal of psychosomatic research* 2002;**53**(1):547-54
7. Phillips B, Young T, Finn L, Asher K, Hening WA, Purvis C. Epidemiology of restless legs symptoms in adults. *Archives of internal medicine* 2000;**160**(14):2137-41

- 1  
2  
3 8. Sevim S, Dogu O, Camdeviren H, et al. Unexpectedly low prevalence and unusual  
4  
5 characteristics of RLS in Mersin, Turkey. *Neurology* 2003;**61**(11):1562-9  
6  
7
- 8 9. Winter AC, Schurks M, Glynn RJ, et al. Vascular risk factors, cardiovascular disease, and  
9  
10 restless legs syndrome in women. *The American journal of medicine* 2013;**126**(3):220-7,  
11  
12 27 e1-2 doi: 10.1016/j.amjmed.2012.06.040[published Online First: Epub Date]].  
13  
14
- 15 10. Schlesinger I, Erikh I, Avizohar O, Sprecher E, Yarnitsky D. Cardiovascular risk factors in  
16  
17 restless legs syndrome. *Movement disorders : official journal of the Movement Disorder*  
18  
19 *Society* 2009;**24**(11):1587-92 doi: 10.1002/mds.22486[published Online First: Epub  
20  
21 Date]].  
22  
23
- 24 25 11. Winter AC, Berger K, Glynn RJ, et al. Vascular risk factors, cardiovascular disease, and  
26  
27 restless legs syndrome in men. *The American journal of medicine* 2013;**126**(3):228-35,  
28  
29 35 e1-2 doi: 10.1016/j.amjmed.2012.06.039[published Online First: Epub Date]].  
30  
31
- 32 33 12. Kim J, Choi C, Shin K, et al. Prevalence of restless legs syndrome and associated factors in  
34  
35 the Korean adult population: the Korean Health and Genome Study. *Psychiatry and*  
36  
37 *clinical neurosciences* 2005;**59**(3):350-3 doi: 10.1111/j.1440-  
38  
39 1819.2005.01381.x[published Online First: Epub Date]].  
40
- 41 42 13. Gao X, Schwarzschild MA, Wang H, Ascherio A. Obesity and restless legs syndrome in men  
43  
44 and women. *Neurology* 2009;**72**(14):1255-61 doi:  
45  
46 10.1212/01.wnl.0000345673.35676.1c[published Online First: Epub Date]].  
47
- 48 49 14. Batool-Anwar S, Malhotra A, Forman J, Winkelman J, Li Y, Gao X. Restless legs syndrome  
50  
51 and hypertension in middle-aged women. *Hypertension* 2011;**58**(5):791-6 doi:  
52  
53 10.1161/HYPERTENSIONAHA.111.174037[published Online First: Epub Date]].  
54  
55  
56  
57  
58  
59  
60

- 1  
2  
3  
4 15. Ulfberg J, Nystrom B, Carter N, Edling C. Prevalence of restless legs syndrome among men  
5  
6 aged 18 to 64 years: an association with somatic disease and neuropsychiatric symptoms.  
7  
8 Movement disorders : official journal of the Movement Disorder Society  
9  
10 2001;**16**(6):1159-63  
11  
12  
13 16. Allen R, Chen C, Soaita A, et al. A randomized, double-blind, 6-week, dose-ranging study of  
14  
15 pregabalin in patients with restless legs syndrome. Sleep medicine 2010;**11**(6):512-9 doi:  
16  
17 10.1016/j.sleep.2010.03.003[published Online First: Epub Date].  
18  
19  
20 17. Juuti AK, Laara E, Rajala U, et al. Prevalence and associated factors of restless legs in a 57-  
21  
22 year-old urban population in northern Finland. Acta neurologica Scandinavica  
23  
24 2010;**122**(1):63-9 doi: 10.1111/j.1600-0404.2009.01262.x[published Online First: Epub  
25  
26 Date].  
27  
28  
29 18. Wesstrom J, Nilsson S, Sundstrom-Poromaa I, Ulfberg J. Restless legs syndrome among  
30  
31 women: prevalence, co-morbidity and possible relationship to menopause. Climacteric :  
32  
33 the journal of the International Menopause Society 2008;**11**(5):422-8 doi:  
34  
35 10.1080/13697130802359683[published Online First: Epub Date].  
36  
37  
38 19. Winkelman JW, Finn L, Young T. Prevalence and correlates of restless legs syndrome  
39  
40 symptoms in the Wisconsin Sleep Cohort. Sleep medicine 2006;**7**(7):545-52 doi:  
41  
42 10.1016/j.sleep.2006.01.004[published Online First: Epub Date].  
43  
44  
45 20. Winkelman JW, Shahar E, Sharief I, Gottlieb DJ. Association of restless legs syndrome and  
46  
47 cardiovascular disease in the Sleep Heart Health Study. Neurology 2008;**70**(1):35-42 doi:  
48  
49 10.1212/01.wnl.0000287072.93277.c9[published Online First: Epub Date].  
50  
51  
52 21. Winter AC, Schurks M, Glynn RJ, et al. Restless legs syndrome and risk of incident  
53  
54 cardiovascular disease in women and men: prospective cohort study. BMJ open  
55  
56  
57  
58  
59  
60



- 1  
2  
3 2012;**2**(2):e000866 doi: 10.1136/bmjopen-2012-000866[published Online First: Epub  
4 Date]].  
5  
6  
7
- 8 22. Li Y, Walters AS, Chiuve SE, Rimm EB, Winkelman JW, Gao X. Prospective study of  
9 restless legs syndrome and coronary heart disease among women. *Circulation*  
10 2012;**126**(14):1689-94  
11  
12  
13
- 14 23. Li Y, Wang W, Winkelman JW, Malhotra A, Ma J, Gao X. Prospective study of restless legs  
15 syndrome and mortality among men. *Neurology* 2013;**81**(1):52-9  
16  
17  
18
- 19 24. Walters AS, Moussouttas M, Siddiqui F, et al. Prevalence of stroke in Restless Legs  
20 Syndrome: Initial Results Point to the Need for More Sophisticated Studies. *The open*  
21 *neurology journal* 2010;**4**:73-7 doi: 10.2174/1874205X01004010073[published Online  
22 First: Epub Date]].  
23  
24  
25  
26  
27  
28
- 29 25. Schurks M, Winter AC, Berger K, Buring JE, Kurth T. Migraine and restless legs syndrome  
30 in women. *Cephalalgia*;**32**(5):382-9  
31  
32  
33
- 34 26. Winter AC, Schurks M, Berger K, Buring JE, Gaziano JM, Kurth T. Migraine and restless  
35 legs syndrome in men. *Cephalalgia*;**33**(2):130-5  
36  
37  
38
- 39 27. Group CS. Vascular factors and risk of dementia: design of the Three-City Study and  
40 baseline characteristics of the study population. *Neuroepidemiology* 2003;**22**(6):316-25  
41  
42  
43
- 44 28. Maillard P, Delcroix N, Crivello F, et al. An automated procedure for the assessment of  
45 white matter hyperintensities by multispectral (T1, T2, PD) MRI and an evaluation of its  
46 between-centre reproducibility based on two large community databases. *Neuroradiology*  
47 2008;**50**(1):31-42 doi: 10.1007/s00234-007-0312-3[published Online First: Epub Date]].  
48  
49  
50  
51  
52  
53  
54  
55  
56  
57  
58  
59  
60

- 1  
2  
3  
4  
5  
6  
7  
8  
9  
10  
11  
12  
13  
14  
15  
16  
17  
18  
19  
20  
21  
22  
23  
24  
25  
26  
27  
28  
29  
30  
31  
32  
33  
34  
35  
36  
37  
38  
39  
40  
41  
42  
43  
44  
45  
46  
47  
48  
49  
50  
51  
52  
53  
54  
55  
56  
57  
58  
59  
60
29. Soumare A, Elbaz A, Zhu Y, et al. White matter lesions volume and motor performances in the elderly. *Annals of neurology* 2009;**65**(6):706-15 doi: 10.1002/ana.21674[published Online First: Epub Date].
30. Zhu YC, Dufouil C, Soumare A, Mazoyer B, Chabriat H, Tzourio C. High degree of dilated Virchow-Robin spaces on MRI is associated with increased risk of dementia. *Journal of Alzheimer's disease : JAD* 2010;**22**(2):663-72 doi: 10.3233/JAD-2010-100378[published Online First: Epub Date].
31. Berger K, von Eckardstein A, Trenkwalder C, Rothdach A, Junker R, Weiland SK. Iron metabolism and the risk of restless legs syndrome in an elderly general population--the MEMO-Study. *Journal of neurology* 2002;**249**(9):1195-9 doi: 10.1007/s00415-002-0805-2[published Online First: Epub Date].
32. Hogl B, Kiechl S, Willeit J, et al. Restless legs syndrome: a community-based study of prevalence, severity, and risk factors. *Neurology* 2005;**64**(11):1920-4 doi: 10.1212/01.WNL.0000163996.64461.A3[published Online First: Epub Date].
33. Report of the Expert Committee on the Diagnosis and Classification of Diabetes Mellitus. *Diabetes care* 1997;**20**(7):1183-97
34. Nocturnal limb movements are correlated with cerebral white matter hyperintensities. *American Academy of Neurology*; 2012; New Orleans, LA, USA.
35. Henskens LH, Kroon AA, van Oostenbrugge RJ, et al. Associations of ambulatory blood pressure levels with white matter hyperintensity volumes in hypertensive patients. *Journal of hypertension* 2009;**27**(7):1446-52 doi: 10.1097/HJH.0b013e32832b5204[published Online First: Epub Date].

- 1  
2  
3 36. Elwood P, Hack M, Pickering J, Hughes J, Gallacher J. Sleep disturbance, stroke, and heart  
4  
5 disease events: evidence from the Caerphilly cohort. *Journal of epidemiology and*  
6  
7 *community health* 2006;**60**(1):69-73 doi: 10.1136/jech.2005.039057[published Online  
8  
9 First: Epub Date]].
- 10  
11  
12 37. van Straaten EC, Fazekas F, Rostrup E, et al. Impact of white matter hyperintensities scoring  
13  
14 method on correlations with clinical data: the LADIS study. *Stroke; a journal of cerebral*  
15  
16 *circulation* 2006;**37**(3):836-40 doi: 10.1161/01.STR.0000202585.26325.74[published  
17  
18 Online First: Epub Date]].  
19  
20  
21  
22  
23  
24  
25  
26  
27  
28  
29  
30  
31  
32  
33  
34  
35  
36  
37  
38  
39  
40  
41  
42  
43  
44  
45  
46  
47  
48  
49  
50  
51  
52  
53  
54  
55  
56  
57  
58  
59  
60

Table 1. Characteristics of participants by RLS status.

| Characteristic (%)                 | No RLS<br>(n=1050817)                   | RLS<br>(n=218)              |
|------------------------------------|-----------------------------------------|-----------------------------|
| Age (mean, SD)                     | <del>72.1 (4.1)</del> <u>71.6 (3.9)</u> | 71.6 (3.8)                  |
| Sex (% female)                     | <del>59.73</del>                        | 72.9                        |
| Smoking status (%)                 |                                         |                             |
| Never                              | <del>60.0</del> <u>61.3</u>             | 67.0                        |
| Past                               | <del>35.2</del> <u>33.5</u>             | <del>29.4</del> <u>26.6</u> |
| Current                            | <del>4.8</del> <u>5.1</u>               | <del>3.7</del> <u>6.4</u>   |
| Alcohol consumption (%)            |                                         |                             |
| Non-drinker                        | <del>33.6</del> <u>18.1</u>             | <del>39.9</del> <u>22.0</u> |
| 0 to ≤12 g/day                     | <del>41.1</del> <u>44.6</u>             | <del>45.0</del> <u>21.4</u> |
| 12 to ≤24 g/day                    | <del>15.8</del> <u>19.2</u>             | <del>11.0</del> <u>19.3</u> |
| >24 g/day                          | <del>9.2</del> <u>15.3</u>              | <del>4.1</del> <u>11.5</u>  |
| Physically active (%)              | <del>21.3</del> <u>55.9</u>             | <del>16.5</del> <u>63.8</u> |
| Body mass index                    |                                         |                             |
| <25 kg/m <sup>2</sup>              | <del>45.3</del> <u>51.4</u>             | <del>44.5</del> <u>56.0</u> |
| 25 to < 30 kg/m <sup>2</sup>       | <del>40.2</del> <u>38.8</u>             | <del>40.8</del> <u>32.6</u> |
| ≥30 kg/m <sup>2</sup>              | <del>14.5</del> <u>9.8</u>              | <del>14.7</del> <u>11.5</u> |
| History of high blood pressure (%) | <del>86.6</del> <u>73.3</u>             | <del>86.7</del> <u>71.6</u> |
| History of high cholesterol (%)    | <del>63.6</del> <u>58.0</u>             | <del>59.6</del> <u>51.4</u> |
| History of diabetes (%)            | <del>11.8</del> <u>13.0</u>             | 9.2                         |

|                                                                                                           |                             |                             |
|-----------------------------------------------------------------------------------------------------------|-----------------------------|-----------------------------|
| History of cardiovascular disease (%)                                                                     | <del>18.4</del> <u>11.3</u> | <del>17.9</del> <u>7.8</u>  |
| <u>History of stroke (%)</u>                                                                              | <u>4.5</u>                  | <u>1.4</u>                  |
| History of peripheral artery disease (%)                                                                  | <del>4.6</del> <u>2.1</u>   | <del>4.1</del> <u>2.8</u>   |
| History of leg operation (%)                                                                              | 0. <del>6</del> <u>9</u>    | 0.5                         |
| History of edema/swelling of legs and ankles (%)                                                          | <del>29.0</del> <u>19.1</u> | <del>36.7</del> <u>25.2</u> |
| Difficulty sleeping                                                                                       |                             |                             |
| Never                                                                                                     | <del>47.5</del> <u>19.6</u> | <del>44.0</del> <u>14.2</u> |
| Rarely                                                                                                    | <del>30.2</del> <u>52.6</u> | <del>20.2</del> <u>46.8</u> |
| Regularly                                                                                                 | <del>10.8</del> <u>13.1</u> | <del>17.0</del> <u>19.3</u> |
| Often                                                                                                     | <del>10.8</del> <u>12.5</u> | <del>18.8</del> <u>16.5</u> |
| Quality of sleep                                                                                          |                             |                             |
| Good                                                                                                      | <del>52.6</del> <u>46.9</u> | <del>45.0</del> <u>31.2</u> |
| Average                                                                                                   | <del>31.8</del> <u>30.4</u> | <del>33.5</del> <u>38.5</u> |
| Mediocre or bad                                                                                           | <del>12.3</del> <u>9.4</u>  | <del>21.6</del> <u>13.8</u> |
| Take medications for sleep                                                                                | <del>35.2</del> <u>31.2</u> | <del>45.0</del> <u>36.7</u> |
| <u>Volume of white matter hyperintensities</u><br><u>(cm<sup>3</sup>, median and interquartile range)</u> | <u>3.9 (2.7 – 5.8)</u>      | <u>4.0 (2.7 – 6.0)</u>      |

\*Numbers may not add to 100% due to missing data.

List of abbreviations: RLS=restless legs syndrome, SD=standard deviation

Table 2. Cross-sectional age- and sex-adjusted and multivariable-adjusted\* associations between RLS and brain white matter lesion volumes.

| Total WML volume in tertiles | No restless legs syndrome<br>(n=1050817)   | Restless legs syndrome<br>(n=218)        | Age and sex-adjusted<br>odds ratio<br>(95% CI) | Multivariable-adjusted*<br>odds ratio (95%<br>CI)          |
|------------------------------|--------------------------------------------|------------------------------------------|------------------------------------------------|------------------------------------------------------------|
|                              | N (%)                                      | N (%)                                    |                                                |                                                            |
| Lowest Tertile               | <del>343 (32.7)</del><br><u>269 (32.9)</u> | <del>76 (34.9)</del><br><u>73 (33.5)</u> | 1.00                                           | 1.00                                                       |
| Middle Tertile               | <del>348 (33.1)</del><br><u>271 (33.2)</u> | <del>70 (32.1)</del><br><u>71 (32.6)</u> | 0.95<br><u>1.04</u><br>(0.72, 1.52)            | 0.95<br><u>1.09</u><br>(0.66, 1.36)<br><u>(0.75, 1.60)</u> |
| Highest Tertile              | <del>359 (34.2)</del><br><u>277 (33.9)</u> | <del>72 (33.0)</del><br><u>74 (33.9)</u> | 1.00<br><u>1.09</u><br>(0.69, 1.45)            | 1.00<br><u>1.17</u><br>(0.69, 1.46)<br><u>(0.79, 1.74)</u> |

Periventricular WML volume in tertiles

|                 |                       |                      |                         |                                               |
|-----------------|-----------------------|----------------------|-------------------------|-----------------------------------------------|
| Lowest Tertile  | <del>341 (32.5)</del> | <del>77 (35.3)</del> | 1.00                    | 1.00                                          |
|                 | <u>267 (32.7)</u>     | <u>74 (33.9)</u>     |                         |                                               |
| Middle Tertile  | <del>351 (33.4)</del> | <del>68 (31.2)</del> | 0.86                    | <u>0.86<sup>85</sup></u>                      |
|                 | <u>273 (33.4)</u>     | <u>69 (31.7)</u>     | (0.49, 1.51)            | <u>(0.49<sup>48</sup>, 1.51<sup>50</sup>)</u> |
| Highest Tertile | <del>358 (34.1)</del> | <del>73 (33.5)</del> | <del>1.00</del>         | <del>1.02</del>                               |
|                 | <u>277 (33.9)</u>     | <u>75 (34.4)</u>     | <del>(0.46, 2.18)</del> | <del>(0.47, 2.25)</del>                       |
|                 |                       |                      | <u>0.96</u>             | <u>0.91</u>                                   |
|                 |                       |                      | <u>(0.44, 2.10)</u>     | <u>(0.41, 2.01)</u>                           |

Deep WML volume in  
tertiles

|                 |                       |                      |                         |                         |
|-----------------|-----------------------|----------------------|-------------------------|-------------------------|
| Lowest Tertile  | <del>352 (33.5)</del> | <del>67 (30.7)</del> | 1.00                    | 1.00                    |
|                 | <u>275 (33.7)</u>     | <u>66 (30.3)</u>     |                         |                         |
| Middle Tertile  | <del>340 (32.4)</del> | <del>77 (35.3)</del> | <del>1.24</del>         | <del>1.22</del>         |
|                 | <u>266 (32.6)</u>     | <u>77 (35.3)</u>     | <del>(0.84, 1.84)</del> | <del>(0.82, 1.81)</del> |
|                 |                       |                      | <u>1.27</u>             | <u>1.24</u>             |
|                 |                       |                      | <u>(0.85, 1.90)</u>     | <u>(0.82, 1.87)</u>     |
| Highest Tertile | <del>358 (34.1)</del> | <del>74 (33.9)</del> | <del>1.21</del>         | <del>1.18</del>         |
|                 | <u>276 (33.8)</u>     | <u>75 (34.4)</u>     | <del>(0.76, 1.94)</del> | <del>(0.73, 1.90)</del> |
|                 |                       |                      | <u>1.27</u>             | <u>1.33</u>             |
|                 |                       |                      | <u>(0.78, 2.05)</u>     | <u>(0.81, 2.17)</u>     |

\*Adjusted for age, sex, smoking status, alcohol consumption, physical activity, body mass index,  
history of hypertension, history of diabetes, history of cardiovascular disease, history of

1  
2  
3 peripheral artery disease, history of leg operation, and history of edema/swelling of legs and  
4  
5 ankles.  
6  
7  
8  
9  
10  
11  
12  
13  
14  
15  
16  
17  
18  
19  
20  
21  
22  
23  
24  
25  
26  
27  
28  
29  
30  
31  
32  
33  
34  
35  
36  
37  
38  
39  
40  
41  
42  
43  
44  
45  
46  
47  
48  
49  
50  
51  
52  
53  
54  
55  
56  
57  
58  
59  
60

For peer review only



Figure 1. Flowchart of subjects included in this analysis.

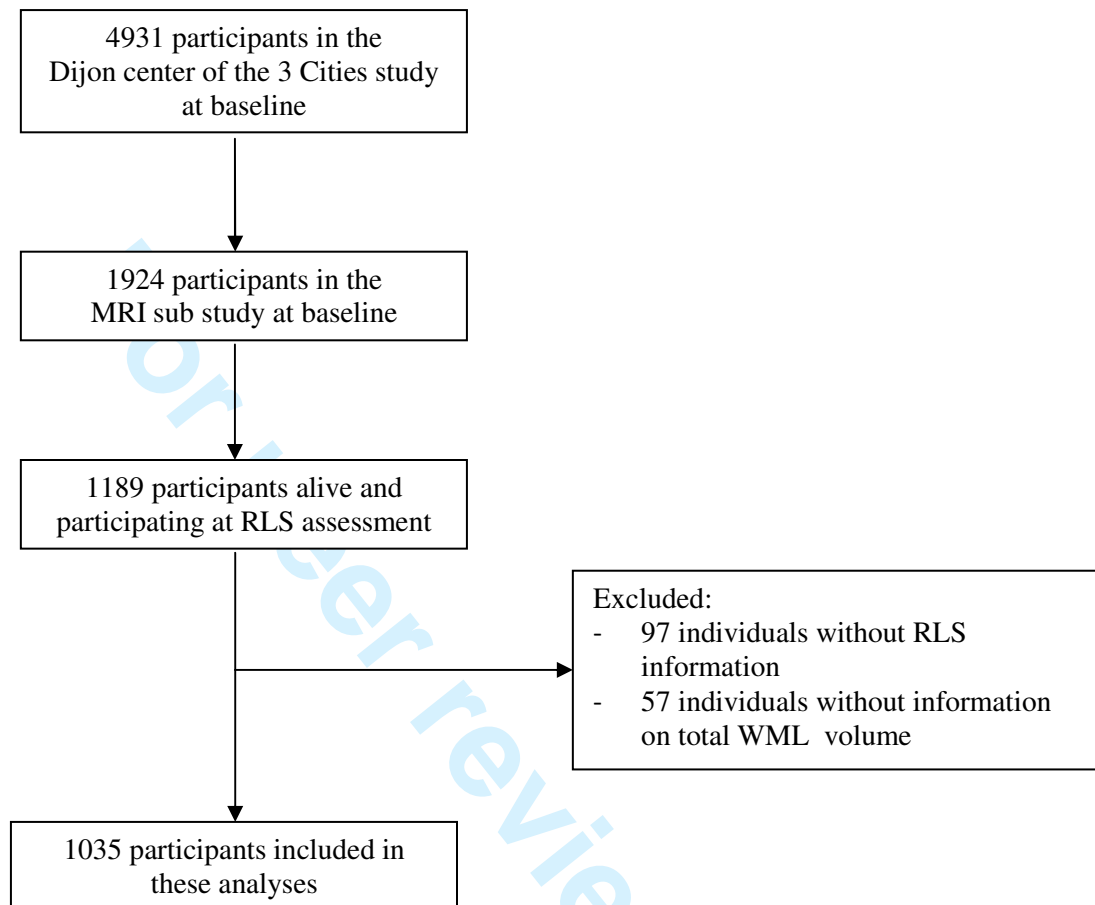

## STROBE Statement—checklist of items that should be included in reports of observational studies

|                              | Item No | Recommendation                                                                                                                                                                                                                                                                                                                                                                                                                                                         | Page  |
|------------------------------|---------|------------------------------------------------------------------------------------------------------------------------------------------------------------------------------------------------------------------------------------------------------------------------------------------------------------------------------------------------------------------------------------------------------------------------------------------------------------------------|-------|
| <b>Title and abstract</b>    | 1       | (a) Indicate the study's design with a commonly used term in the title or the abstract                                                                                                                                                                                                                                                                                                                                                                                 | 1, 5  |
|                              |         | (b) Provide in the abstract an informative and balanced summary of what was done and what was found                                                                                                                                                                                                                                                                                                                                                                    | 5     |
| <b>Introduction</b>          |         |                                                                                                                                                                                                                                                                                                                                                                                                                                                                        |       |
| Background/rationale         | 2       | Explain the scientific background and rationale for the investigation being reported                                                                                                                                                                                                                                                                                                                                                                                   | 7     |
| Objectives                   | 3       | State specific objectives, including any prespecified hypotheses                                                                                                                                                                                                                                                                                                                                                                                                       | 8     |
| <b>Methods</b>               |         |                                                                                                                                                                                                                                                                                                                                                                                                                                                                        |       |
| Study design                 | 4       | Present key elements of study design early in the paper                                                                                                                                                                                                                                                                                                                                                                                                                | 8     |
| Setting                      | 5       | Describe the setting, locations, and relevant dates, including periods of recruitment, exposure, follow-up, and data collection                                                                                                                                                                                                                                                                                                                                        | 8-11  |
| Participants                 | 6       | (a) <i>Cohort study</i> —Give the eligibility criteria, and the sources and methods of selection of participants. Describe methods of follow-up<br><i>Case-control study</i> —Give the eligibility criteria, and the sources and methods of case ascertainment and control selection. Give the rationale for the choice of cases and controls<br><i>Cross-sectional study</i> —Give the eligibility criteria, and the sources and methods of selection of participants | 8     |
|                              |         | (b) <i>Cohort study</i> —For matched studies, give matching criteria and number of exposed and unexposed<br><i>Case-control study</i> —For matched studies, give matching criteria and the number of controls per case                                                                                                                                                                                                                                                 | NA    |
| Variables                    | 7       | Clearly define all outcomes, exposures, predictors, potential confounders, and effect modifiers. Give diagnostic criteria, if applicable                                                                                                                                                                                                                                                                                                                               | 8-11  |
| Data sources/<br>measurement | 8*      | For each variable of interest, give sources of data and details of methods of assessment (measurement). Describe comparability of assessment methods if there is more than one group                                                                                                                                                                                                                                                                                   | 8-11  |
| Bias                         | 9       | Describe any efforts to address potential sources of bias                                                                                                                                                                                                                                                                                                                                                                                                              | 11,12 |
| Study size                   | 10      | Explain how the study size was arrived at                                                                                                                                                                                                                                                                                                                                                                                                                              | 8, 11 |
| Quantitative variables       | 11      | Explain how quantitative variables were handled in the analyses. If applicable, describe which groupings were chosen and why                                                                                                                                                                                                                                                                                                                                           | 8-11  |
| Statistical methods          | 12      | (a) Describe all statistical methods, including those used to control for confounding                                                                                                                                                                                                                                                                                                                                                                                  | 11-12 |
|                              |         | (b) Describe any methods used to examine subgroups and interactions                                                                                                                                                                                                                                                                                                                                                                                                    | NA    |
|                              |         | (c) Explain how missing data were addressed                                                                                                                                                                                                                                                                                                                                                                                                                            | 12    |
|                              |         | (d) <i>Cohort study</i> —If applicable, explain how loss to follow-up was addressed<br><i>Case-control study</i> —If applicable, explain how matching of cases and controls was addressed<br><i>Cross-sectional study</i> —If applicable, describe analytical methods taking account of sampling strategy                                                                                                                                                              | NA    |
|                              |         | (e) Describe any sensitivity analyses                                                                                                                                                                                                                                                                                                                                                                                                                                  | NA    |

**Results**

|                  |     |                                                                                                                                                                                                              |                |
|------------------|-----|--------------------------------------------------------------------------------------------------------------------------------------------------------------------------------------------------------------|----------------|
| Participants     | 13* | (a) Report numbers of individuals at each stage of study—eg numbers potentially eligible, examined for eligibility, confirmed eligible, included in the study, completing follow-up, and analysed            | 8,11, Table 1  |
|                  |     | (b) Give reasons for non-participation at each stage                                                                                                                                                         | 8, 11          |
|                  |     | (c) Consider use of a flow diagram                                                                                                                                                                           | NA             |
| Descriptive data | 14* | (a) Give characteristics of study participants (eg demographic, clinical, social) and information on exposures and potential confounders                                                                     | Table 1        |
|                  |     | (b) Indicate number of participants with missing data for each variable of interest                                                                                                                          | 12             |
|                  |     | (c) <i>Cohort study</i> —Summarise follow-up time (eg, average and total amount)                                                                                                                             | NA             |
| Outcome data     | 15* | <i>Cohort study</i> —Report numbers of outcome events or summary measures over time                                                                                                                          |                |
|                  |     | <i>Case-control study</i> —Report numbers in each exposure category, or summary measures of exposure                                                                                                         |                |
|                  |     | <i>Cross-sectional study</i> —Report numbers of outcome events or summary measures                                                                                                                           | Table 2        |
| Main results     | 16  | (a) Give unadjusted estimates and, if applicable, confounder-adjusted estimates and their precision (eg, 95% confidence interval). Make clear which confounders were adjusted for and why they were included | 12-13, Table 2 |
|                  |     | (b) Report category boundaries when continuous variables were categorized                                                                                                                                    | 9-12           |
|                  |     | (c) If relevant, consider translating estimates of relative risk into absolute risk for a meaningful time period                                                                                             | NA             |
| Other analyses   | 17  | Report other analyses done—eg analyses of subgroups and interactions, and sensitivity analyses                                                                                                               | NA             |

**Discussion**

|                  |    |                                                                                                                                                                            |       |
|------------------|----|----------------------------------------------------------------------------------------------------------------------------------------------------------------------------|-------|
| Key results      | 18 | Summarise key results with reference to study objectives                                                                                                                   | 13    |
| Limitations      | 19 | Discuss limitations of the study, taking into account sources of potential bias or imprecision. Discuss both direction and magnitude of any potential bias                 | 15    |
| Interpretation   | 20 | Give a cautious overall interpretation of results considering objectives, limitations, multiplicity of analyses, results from similar studies, and other relevant evidence | 13-15 |
| Generalisability | 21 | Discuss the generalisability (external validity) of the study results                                                                                                      | 15    |

**Other information**

|         |    |                                                                                                                                                               |     |
|---------|----|---------------------------------------------------------------------------------------------------------------------------------------------------------------|-----|
| Funding | 22 | Give the source of funding and the role of the funders for the present study and, if applicable, for the original study on which the present article is based | 2-3 |
|---------|----|---------------------------------------------------------------------------------------------------------------------------------------------------------------|-----|

\*Give information separately for cases and controls in case-control studies and, if applicable, for exposed and unexposed groups in cohort and cross-sectional studies.

**Note:** An Explanation and Elaboration article discusses each checklist item and gives methodological background and published examples of transparent reporting. The STROBE checklist is best used in conjunction with this article (freely available on the Web sites of PLoS Medicine at <http://www.plosmedicine.org/>, Annals of Internal Medicine at <http://www.annals.org/>, and Epidemiology at <http://www.epidem.com/>). Information on the STROBE Initiative is available at [www.strobe-statement.org](http://www.strobe-statement.org).

1  
2  
3  
4  
5  
6  
7  
8  
9  
10  
11  
12  
13  
14  
15  
16  
17  
18  
19  
20  
21  
22  
23  
24  
25  
26  
27  
28  
29  
30  
31  
32  
33  
34  
35  
36  
37  
38  
39  
40  
41  
42  
43  
44  
45  
46  
47  
48  
49  
50  
51  
52  
53  
54  
55  
56  
57  
58  
59  
60

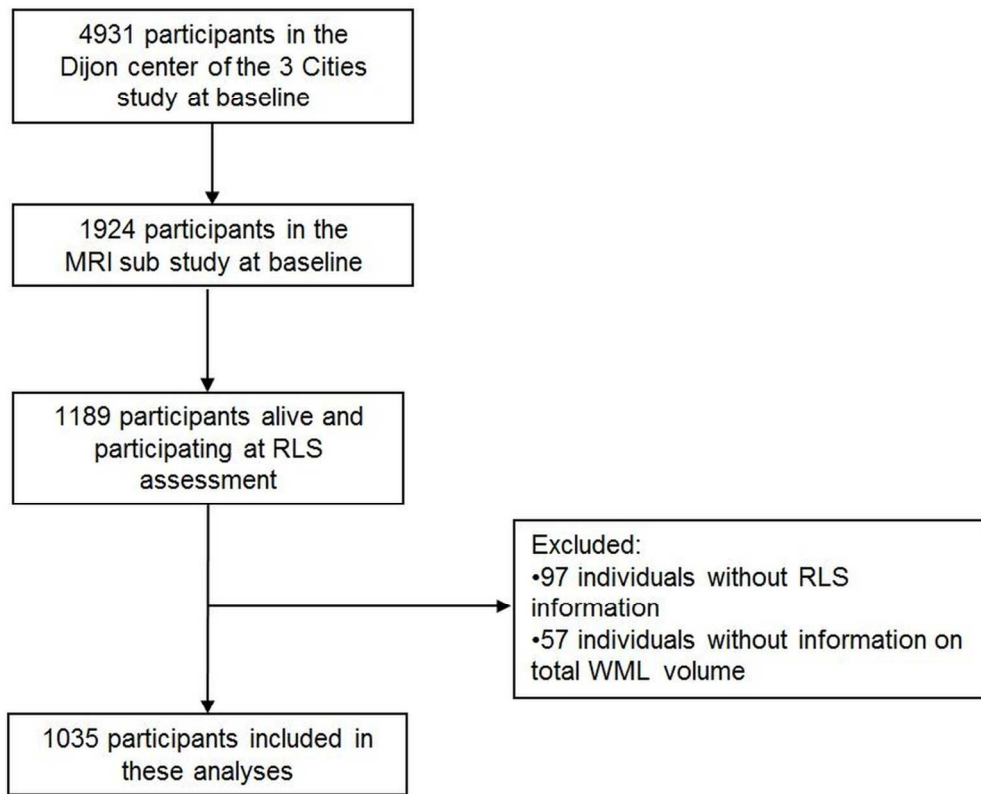

111x90mm (300 x 300 DPI)

Peer Review Only
